# Supplementary material for: Abnormal low expression of SFTPC promotes the proliferation of lung adenocarcinoma by enhancing PI3K/AKT/mTOR signaling transduction
Source: publisher site journal article supplement (doi:10.18632/aging.205191), 2023-11-12
Supplement: Supplementary file [file aging-v15i21-205191-supplementary-material-SD2.pdf]

## SUPPLEMENTARY TABLES

**Supplementary Table 1. Sequences of SFTPC-RNAi.**

| <b>gene</b> | <b>RNAi sequence</b>  |
|-------------|-----------------------|
| shSFTPC#1   | GCTGCTACATCATGAAGATAG |
| shSFTPC#2   | GGTGTATGACTACCAGCAGCT |

**Supplementary Table 2. Antibody information.**

|                                                  |
|--------------------------------------------------|
| SFTPC (DF6647, Affinity)                         |
| PI3K (AF6241, Affinity)                          |
| phospho-PI3K (AF3242, Affinity)                  |
| AKT (AF6261, Affinity)                           |
| phospho-AKT (AF0016, Affinity)                   |
| mTOR (AF6308, Affinity)                          |
| phospho-mTOR (AF3309, Affinity)                  |
| RPS6KB1 (AF6226, Affinity)                       |
| phospho-RPS6KB1 (AF3228, Affinity)               |
| GAPDH (T0004, Affinity)                          |
| Goat Anti-Rabbit IgG (H+L) HRP (S0001, Affinity) |
| Goat Anti-Mouse IgG (H+L) HRP (S0002, Affinity)  |
