# Supplementary material for: Abnormal low expression of SFTPC promotes the proliferation of lung adenocarcinoma by enhancing PI3K/AKT/mTOR signaling transduction
Source: Aging (Albany NY). 2023 Nov 12;15(21):12451–75. doi: 10.18632/aging.205191 (PMC10683597; doi:10.18632/aging.205191)
Supplement: Supplementary Table 3 [file aging-15-205191-s003.xlsx]

## Sheet: Sheet1
Supplementary Table 3. GSEA results of the stratified subgroups of SFTPC.
TCGA-LUAD	NES	p.adjust	qvalue
GOBP_CHROMOSOME_SEGREGATION	-2.70211	5.1e-09	3.15e-09
GOBP_NUCLEAR_CHROMOSOME_SEGREGATION	-2.68577	5.1e-09	3.15e-09
GOBP_MITOTIC_SISTER_CHROMATID_SEGREGATION	-2.65772	5.1e-09	3.15e-09
GOBP_SISTER_CHROMATID_SEGREGATION	-2.61139	5.1e-09	3.15e-09
GOBP_DNA_DEPENDENT_DNA_REPLICATION	-2.59389	5.1e-09	3.15e-09
GOBP_MITOTIC_NUCLEAR_DIVISION	-2.50543	5.1e-09	3.15e-09
GOBP_DNA_REPLICATION	-2.47932	5.1e-09	3.15e-09
GOBP_DOUBLE_STRAND_BREAK_REPAIR	-2.47499	5.1e-09	3.15e-09
GOBP_MEIOTIC_CELL_CYCLE_PROCESS	-2.4535	5.1e-09	3.15e-09
GOBP_DNA_REPAIR	-2.44246	5.1e-09	3.15e-09
GOBP_ORGANELLE_FISSION	-2.43598	5.1e-09	3.15e-09
GOBP_REGULATION_OF_CHROMOSOME_ORGANIZATION	-2.40139	5.1e-09	3.15e-09
GOBP_RIBOSOME_BIOGENESIS	-2.39798	5.1e-09	3.15e-09
GOBP_RIBONUCLEOPROTEIN_COMPLEX_BIOGENESIS	-2.39558	5.1e-09	3.15e-09
GOBP_DNA_GEOMETRIC_CHANGE	-2.38704	5.1e-09	3.15e-09
GOBP_MEIOTIC_CELL_CYCLE	-2.37462	5.1e-09	3.15e-09
GOBP_REGULATION_OF_CHROMOSOME_SEGREGATION	-2.37213	5.1e-09	3.15e-09
GOBP_RECOMBINATIONAL_REPAIR	-2.3716	5.1e-09	3.15e-09
GOBP_DNA_REPLICATION_INITIATION	-2.36737	5.1e-09	3.15e-09
GOBP_MEIOSIS_I_CELL_CYCLE_PROCESS	-2.36433	5.1e-09	3.15e-09
GOBP_MICROTUBULE_CYTOSKELETON_ORGANIZATION_INVOLVED_IN_MITOSIS	-2.36126	5.1e-09	3.15e-09
GOBP_DNA_CONFORMATION_CHANGE	-2.3586	5.1e-09	3.15e-09
GOBP_MITOTIC_SPINDLE_ORGANIZATION	-2.35495	5.1e-09	3.15e-09
GOBP_NCRNA_PROCESSING	-2.33495	5.1e-09	3.15e-09
GOBP_CHROMOSOME_SEPARATION	-2.33284	5.1e-09	3.15e-09
GOBP_CELL_CYCLE_CHECKPOINT_SIGNALING	-2.33132	5.1e-09	3.15e-09
GOBP_CHROMOSOME_LOCALIZATION	-2.32645	5.1e-09	3.15e-09
GOBP_METAPHASE_PLATE_CONGRESSION	-2.30244	5.1e-09	3.15e-09
GOBP_REGULATION_OF_CHROMOSOME_SEPARATION	-2.28756	5.1e-09	3.15e-09
GOBP_ATTACHMENT_OF_SPINDLE_MICROTUBULES_TO_KINETOCHORE	-2.28365	1.65e-07	1.02e-07
GOBP_METAPHASE_ANAPHASE_TRANSITION_OF_CELL_CYCLE	-2.2768	7.14e-09	4.41e-09
GOBP_MEIOTIC_CHROMOSOME_SEGREGATION	-2.27099	5.1e-09	3.15e-09
GOBP_PROTEIN_DNA_COMPLEX_SUBUNIT_ORGANIZATION	-2.25523	5.1e-09	3.15e-09
GOBP_RRNA_METABOLIC_PROCESS	-2.25097	5.1e-09	3.15e-09
GOBP_SPINDLE_ORGANIZATION	-2.24694	5.1e-09	3.15e-09
GOBP_MITOTIC_METAPHASE_PLATE_CONGRESSION	-2.23427	6.7e-08	4.14e-08
GOBP_MITOTIC_CELL_CYCLE_CHECKPOINT_SIGNALING	-2.23373	5.1e-09	3.15e-09
GOBP_MITOCHONDRIAL_TRANSLATION	-2.22613	6.72e-08	4.15e-08
GOBP_MITOTIC_SPINDLE_ASSEMBLY	-2.2204	9.3e-08	5.74e-08
GOBP_TELOMERE_MAINTENANCE	-2.21731	5.1e-09	3.15e-09
GOBP_PROTEIN_LOCALIZATION_TO_CHROMOSOME	-2.21362	4.25e-08	2.63e-08
GOBP_DNA_STRAND_ELONGATION	-2.21102	2.68e-07	1.66e-07
GOBP_REGULATION_OF_DNA_DEPENDENT_DNA_REPLICATION	-2.21008	1.61e-07	9.97e-08
GOBP_NCRNA_METABOLIC_PROCESS	-2.20842	5.1e-09	3.15e-09
GOBP_TELOMERE_ORGANIZATION	-2.20718	5.1e-09	3.15e-09
GOBP_REGULATION_OF_DNA_REPLICATION	-2.20177	5.1e-09	3.15e-09
GOBP_DNA_RECOMBINATION	-2.19982	5.1e-09	3.15e-09
GOBP_RNA_3_END_PROCESSING	-2.19969	1.03e-08	6.35e-09
GOBP_SPINDLE_ASSEMBLY	-2.185	5.1e-09	3.15e-09
GOBP_CELL_CYCLE_DNA_REPLICATION	-2.18485	7.95e-07	4.91e-07
GOBP_MITOCHONDRIAL_GENE_EXPRESSION	-2.18374	2.88e-08	1.78e-08
GOBP_CENTROMERE_COMPLEX_ASSEMBLY	-2.1791	6.52e-07	4.03e-07
GOBP_PROTEIN_DNA_COMPLEX_ASSEMBLY	-2.17863	1.29e-08	7.98e-09
GOBP_REGULATION_OF_DNA_REPAIR	-2.17814	5.96e-09	3.68e-09
GOBP_NEGATIVE_REGULATION_OF_CHROMOSOME_ORGANIZATION	-2.17737	7.16e-08	4.42e-08
GOBP_KINETOCHORE_ORGANIZATION	-2.17112	1.53e-07	9.48e-08
GOBP_RIBOSOMAL_LARGE_SUBUNIT_BIOGENESIS	-2.15827	2.53e-07	1.56e-07
GOBP_CHROMOSOME_ORGANIZATION_INVOLVED_IN_MEIOTIC_CELL_CYCLE	-2.15282	2.06e-06	1.27e-06
GOBP_CELL_CYCLE_G2_M_PHASE_TRANSITION	-2.14679	5.64e-09	3.48e-09
GOBP_FEMALE_MEIOTIC_NUCLEAR_DIVISION	-2.14174	2.74e-06	1.69e-06
GOBP_REGULATION_OF_DOUBLE_STRAND_BREAK_REPAIR	-2.13901	7.48e-08	4.62e-08
GOBP_DNA_UNWINDING_INVOLVED_IN_DNA_REPLICATION	-2.13525	1.04e-06	6.42e-07
GOBP_HOMOLOGOUS_RECOMBINATION	-2.13318	1.22e-06	7.56e-07
GOBP_DNA_INTEGRITY_CHECKPOINT_SIGNALING	-2.12948	6.81e-08	4.21e-08
GOBP_PROTEIN_LOCALIZATION_TO_CONDENSED_CHROMOSOME	-2.12893	1.16e-06	7.15e-07
GOBP_REGULATION_OF_MITOTIC_SISTER_CHROMATID_SEGREGATION	-2.12523	7.7e-06	4.76e-06
GOBP_PROTEIN_LOCALIZATION_TO_CHROMOSOME_CENTROMERIC_REGION	-2.12288	7.5e-06	4.63e-06
GOBP_NEGATIVE_REGULATION_OF_METAPHASE_ANAPHASE_TRANSITION_OF_CELL_CYCLE	-2.09923	7.9e-06	4.88e-06
GOBP_MATURATION_OF_5_8S_RRNA	-2.09541	3.59e-05	2.22e-05
GOBP_RIBONUCLEOPROTEIN_COMPLEX_SUBUNIT_ORGANIZATION	-2.0914	5.1e-09	3.15e-09
GOBP_SISTER_CHROMATID_COHESION	-2.08053	6.11e-06	3.77e-06
GOBP_TRNA_METABOLIC_PROCESS	-2.07826	5.84e-08	3.61e-08
GOBP_CHROMOSOME_CONDENSATION	-2.07621	0.000130595	8.07e-05
GOBP_DNA_STRAND_ELONGATION_INVOLVED_IN_DNA_REPLICATION	-2.06517	5.07e-06	3.13e-06
GOBP_BINDING_OF_SPERM_TO_ZONA_PELLUCIDA	-2.06382	4.07e-05	2.51e-05
GOBP_REGULATION_OF_NUCLEAR_DIVISION	-2.06205	1.2e-07	7.4e-08
GOBP_DNA_REPLICATION_CHECKPOINT_SIGNALING	-2.05834	2.71e-05	1.67e-05
GOBP_KINETOCHORE_ASSEMBLY	-2.05794	1.78e-05	1.1e-05
GOBP_REGULATION_OF_CELL_CYCLE_G2_M_PHASE_TRANSITION	-2.05716	1.29e-06	7.95e-07
GOBP_MICROTUBULE_ORGANIZING_CENTER_ORGANIZATION	-2.05473	1.72e-07	1.06e-07
GOBP_ESTABLISHMENT_OF_PROTEIN_LOCALIZATION_TO_CHROMOSOME	-2.04964	4.84e-05	2.99e-05
GOBP_MITOTIC_CHROMOSOME_CONDENSATION	-2.04729	3.82e-05	2.36e-05
GOBP_COLLAGEN_FIBRIL_ORGANIZATION	-2.02908	5.27e-05	3.25e-05
GOBP_POSITIVE_REGULATION_OF_CELL_CYCLE_PROCESS	-2.02778	5.1e-09	3.15e-09
GOBP_DNA_DEPENDENT_DNA_REPLICATION_MAINTENANCE_OF_FIDELITY	-2.02377	0.000110866	6.85e-05
GOBP_REGULATION_OF_MITOTIC_NUCLEAR_DIVISION	-2.02017	2.29e-06	1.42e-06
GOBP_DNA_PACKAGING	-2.01943	1.16e-07	7.17e-08
GOBP_POSITIVE_REGULATION_OF_CHROMOSOME_ORGANIZATION	-2.0177	8.77e-06	5.42e-06
GOBP_REGULATION_OF_DNA_DIRECTED_DNA_POLYMERASE_ACTIVITY	-2.01698	2.89e-06	1.79e-06
GOBP_POSITIVE_REGULATION_OF_TELOMERASE_RNA_LOCALIZATION_TO_CAJAL_BODY	-2.01698	3.74e-05	2.31e-05
GOBP_ESTABLISHMENT_OF_PROTEIN_LOCALIZATION_TO_TELOMERE	-2.01331	0.000110866	6.85e-05
GOBP_REGULATION_OF_DOUBLE_STRAND_BREAK_REPAIR_VIA_HOMOLOGOUS_RECOMBINATION	-2.00624	9.64e-05	5.95e-05
GOBP_POSITIVE_REGULATION_OF_CELL_CYCLE_G2_M_PHASE_TRANSITION	-2.00458	0.000203274	0.000125535
GOBP_EMBRYONIC_SKELETAL_SYSTEM_MORPHOGENESIS	-2.00229	4.14e-06	2.56e-06
GOBP_NUCLEOSIDE_MONOPHOSPHATE_BIOSYNTHETIC_PROCESS	-1.99877	0.000137956	8.52e-05
GOBP_MITOTIC_G2_M_TRANSITION_CHECKPOINT	-1.99503	7.92e-05	4.89e-05
GOBP_NCRNA_3_END_PROCESSING	-1.99452	0.000220063	0.000135903
GOBP_MATURATION_OF_5_8S_RRNA_FROM_TRICISTRONIC_RRNA_TRANSCRIPT_SSU_RRNA_5_8S_RRNA_LSU_RRNA	-1.99321	0.000250151	0.000154484
GOBP_POSITIVE_REGULATION_OF_DNA_REPAIR	-1.9925	3.9e-05	2.41e-05
GOBP_HOMOLOGOUS_CHROMOSOME_SEGREGATION	-1.99064	5.43e-05	3.36e-05
GOBP_MRNA_3_END_PROCESSING	-1.98988	4.66e-05	2.88e-05
GOBP_NEGATIVE_REGULATION_OF_NUCLEAR_DIVISION	-1.98935	9.16e-05	5.66e-05
GOBP_NUCLEOSOME_ORGANIZATION	-1.98899	6.04e-06	3.73e-06
GOBP_NUCLEOBASE_BIOSYNTHETIC_PROCESS	-1.98836	0.000211442	0.000130579
GOBP_MITOTIC_DNA_INTEGRITY_CHECKPOINT_SIGNALING	-1.98788	9.79e-05	6.05e-05
GOBP_CLEAVAGE_INVOLVED_IN_RRNA_PROCESSING	-1.98069	0.000338071	0.00020878
GOBP_ATTACHMENT_OF_MITOTIC_SPINDLE_MICROTUBULES_TO_KINETOCHORE	-1.97953	0.000124376	7.68e-05
GOBP_MEIOTIC_SPINDLE_ORGANIZATION	-1.97197	7.7e-05	4.75e-05
GOBP_MITOTIC_CELL_CYCLE_PHASE_TRANSITION	-1.97139	5.1e-09	3.15e-09
GOBP_SPLICEOSOMAL_SNRNP_ASSEMBLY	-1.97069	0.000152216	9.4e-05
GOBP_ANAPHASE_PROMOTING_COMPLEX_DEPENDENT_CATABOLIC_PROCESS	-1.96889	0.000392611	0.000242462
GOBP_DOUBLE_STRAND_BREAK_REPAIR_VIA_BREAK_INDUCED_REPLICATION	-1.96872	2.56e-05	1.58e-05
GOBP_MITOTIC_DNA_REPLICATION	-1.9663	4.66e-05	2.88e-05
GOBP_HISTONE_EXCHANGE	-1.96567	0.000237742	0.000146821
GOBP_PROTEIN_K11_LINKED_UBIQUITINATION	-1.96425	0.000277371	0.000171294
GOBP_RIBONUCLEOSIDE_MONOPHOSPHATE_BIOSYNTHETIC_PROCESS	-1.96291	0.000875672	0.000540782
GOBP_TRNA_PROCESSING	-1.96142	8.77e-06	5.42e-06
GOBP_CENTROSOME_DUPLICATION	-1.96075	7.2e-05	4.45e-05
GOBP_PROTEIN_LOCALIZATION_TO_CHROMOSOME_TELOMERIC_REGION	-1.96005	0.000346039	0.000213701
GOBP_REGULATION_OF_SPINDLE_ORGANIZATION	-1.95788	0.000316775	0.000195629
GOBP_MATURATION_OF_SSU_RRNA_FROM_TRICISTRONIC_RRNA_TRANSCRIPT_SSU_RRNA_5_8S_RRNA_LSU_RRNA	-1.95118	0.00183155	0.00113109
GOBP_REGULATION_OF_ATTACHMENT_OF_SPINDLE_MICROTUBULES_TO_KINETOCHORE	-1.94469	0.000101727	6.28e-05
GOBP_RIBOSOMAL_SMALL_SUBUNIT_BIOGENESIS	-1.94359	0.000216589	0.000133757
GOBP_NEGATIVE_REGULATION_OF_DNA_REPAIR	-1.9424	0.00054753	0.000338134
GOBP_MATURATION_OF_SSU_RRNA	-1.94205	0.000554193	0.000342249
GOBP_POSITIVE_REGULATION_OF_CELL_CYCLE	-1.93856	5.1e-09	3.15e-09
GOBP_MITOTIC_G2_DNA_DAMAGE_CHECKPOINT_SIGNALING	-1.9384	0.00119926	0.000740617
GOBP_DNA_REPLICATION_INDEPENDENT_CHROMATIN_ORGANIZATION	-1.93633	0.00107744	0.000665387
GOBP_TELOMERE_MAINTENANCE_VIA_TELOMERE_LENGTHENING	-1.92998	8.64e-05	5.34e-05
GOBP_MEIOTIC_CELL_CYCLE_PHASE_TRANSITION	-1.92881	0.000124376	7.68e-05
GOBP_RIBOSOME_ASSEMBLY	-1.91992	0.000386322	0.000238578
GOBP_REPLICATION_FORK_PROCESSING	-1.91767	0.00121142	0.000748131
GOBP_REGULATION_OF_TELOMERE_MAINTENANCE	-1.91682	9.03e-05	5.58e-05
GOBP_MATURATION_OF_LSU_RRNA	-1.91309	0.00143609	0.000886874
GOBP_BASE_EXCISION_REPAIR	-1.91166	0.00036085	0.000222848
GOBP_POSITIVE_REGULATION_OF_DNA_REPLICATION	-1.90732	0.000936712	0.000578479
GOBP_NEGATIVE_REGULATION_OF_DNA_REPLICATION	-1.90717	0.00221664	0.00136892
GOBP_MRNA_PROCESSING	-1.90382	5.1e-09	3.15e-09
GOBP_POSITIVE_REGULATION_OF_MITOTIC_CELL_CYCLE	-1.89988	2.68e-05	1.66e-05
GOBP_POSITIVE_REGULATION_OF_METAPHASE_ANAPHASE_TRANSITION_OF_CELL_CYCLE	-1.8989	0.00176743	0.0010915
GOBP_REGULATION_OF_TELOMERE_MAINTENANCE_VIA_TELOMERE_LENGTHENING	-1.89562	0.000422758	0.000261079
GOBP_INTRACELLULAR_PROTEIN_TRANSMEMBRANE_TRANSPORT	-1.89381	0.000777558	0.000480191
GOBP_REGULATION_OF_UBIQUITIN_PROTEIN_LIGASE_ACTIVITY	-1.89115	0.00195954	0.00121014
GOBP_POSITIVE_REGULATION_OF_CHROMOSOME_SEPARATION	-1.89029	0.00296034	0.00182819
GOBP_GLUTAMINE_METABOLIC_PROCESS	-1.8895	0.00195954	0.00121014
GOBP_HOMOLOGOUS_CHROMOSOME_PAIRING_AT_MEIOSIS	-1.8881	0.00130923	0.000808531
GOBP_CHROMATIN_REMODELING	-1.88625	2.34e-06	1.45e-06
GOBP_REGULATION_OF_CENTROSOME_CYCLE	-1.88595	0.000778793	0.000480954
GOBP_TELOMERASE_RNA_LOCALIZATION	-1.88164	0.00260839	0.00161084
GOBP_RNA_DEPENDENT_DNA_BIOSYNTHETIC_PROCESS	-1.87936	0.000621482	0.000383804
GOBP_NUCLEUS_ORGANIZATION	-1.87836	2.88e-05	1.78e-05
GOBP_REGULATION_OF_RESPONSE_TO_DNA_DAMAGE_STIMULUS	-1.87763	7.51e-07	4.64e-07
GOBP_MATURATION_OF_LSU_RRNA_FROM_TRICISTRONIC_RRNA_TRANSCRIPT_SSU_RRNA_5_8S_RRNA_LSU_RRNA	-1.87649	0.00141852	0.000876025
GOBP_RNA_METHYLATION	-1.87645	0.000422185	0.000260726
GOBP_REGULATION_OF_PROTEIN_LOCALIZATION_TO_CHROMOSOME_TELOMERIC_REGION	-1.87407	0.000973573	0.000601242
GOBP_RNA_SPLICING_VIA_TRANSESTERIFICATION_REACTIONS	-1.8726	3.92e-08	2.42e-08
GOBP_POSITIVE_REGULATION_OF_MITOTIC_CELL_CYCLE_PHASE_TRANSITION	-1.86815	8.66e-05	5.35e-05
GOBP_SIGNAL_TRANSDUCTION_IN_RESPONSE_TO_DNA_DAMAGE	-1.86673	1.04e-05	6.42e-06
GOBP_RNA_SPLICING	-1.86665	5.1e-09	3.15e-09
GOBP_RIBOSOMAL_LARGE_SUBUNIT_ASSEMBLY	-1.86655	0.00350224	0.00216285
GOBP_MITOCHONDRIAL_RNA_METABOLIC_PROCESS	-1.86527	0.00168032	0.0010377
GOBP_NON_MEMBRANE_BOUNDED_ORGANELLE_ASSEMBLY	-1.86416	5.1e-09	3.15e-09
GOBP_POSITIVE_REGULATION_OF_DNA_DEPENDENT_DNA_REPLICATION	-1.85903	0.00137284	0.000847816
GOBP_POSITIVE_REGULATION_OF_CHROMOSOME_SEGREGATION	-1.85604	0.00146969	0.000907623
GOBP_AMP_BIOSYNTHETIC_PROCESS	-1.85581	0.00139965	0.000864373
GOBP_REGULATION_OF_CELL_CYCLE_PHASE_TRANSITION	-1.85379	5.1e-09	3.15e-09
GOBP_RNA_LOCALIZATION	-1.85327	3.08e-06	1.9e-06
GOBP_TRNA_THREONYLCARBAMOYLADENOSINE_METABOLIC_PROCESS	-1.85324	0.00395997	0.00244553
GOBP_REGULATION_OF_MITOTIC_CELL_CYCLE_PHASE_TRANSITION	-1.85135	5.7e-08	3.52e-08
GOBP_NEGATIVE_REGULATION_OF_DNA_DEPENDENT_DNA_REPLICATION	-1.85089	0.00173174	0.00106946
GOBP_REGULATION_OF_ESTABLISHMENT_OF_PROTEIN_LOCALIZATION_TO_CHROMOSOME	-1.8486	0.0015483	0.000956172
GOBP_POSITIVE_REGULATION_OF_UBIQUITIN_PROTEIN_LIGASE_ACTIVITY	-1.84853	0.00121235	0.000748702
GOBP_POSITIVE_REGULATION_OF_ESTABLISHMENT_OF_PROTEIN_LOCALIZATION_TO_TELOMERE	-1.84568	0.000529611	0.000327068
GOBP_EMBRYONIC_SKELETAL_SYSTEM_DEVELOPMENT	-1.83575	4.74e-05	2.93e-05
GOBP_REGULATION_OF_CYTOKINESIS	-1.83544	0.000153011	9.45e-05
GOBP_POSITIVE_REGULATION_OF_CELL_CYCLE_PHASE_TRANSITION	-1.83389	0.000188289	0.00011628
GOBP_MEIOTIC_CHROMOSOME_SEPARATION	-1.8338	0.00398681	0.00246211
GOBP_REGULATION_OF_MITOTIC_CELL_CYCLE	-1.83369	5.1e-09	3.15e-09
GOBP_PROTEIN_TRANSMEMBRANE_IMPORT_INTO_INTRACELLULAR_ORGANELLE	-1.83232	0.00236785	0.0014623
GOBP_POSITIVE_REGULATION_OF_TELOMERE_MAINTENANCE	-1.83232	0.00179199	0.00110667
GOBP_POSITIVE_REGULATION_OF_DOUBLE_STRAND_BREAK_REPAIR	-1.8302	0.00135751	0.000838346
GOBP_REGULATION_OF_DNA_METABOLIC_PROCESS	-1.82997	1.08e-08	6.67e-09
GOBP_NEURON_FATE_SPECIFICATION	-1.82991	0.00728418	0.00449844
GOBP_RNA_5_END_PROCESSING	-1.8244	0.00449238	0.00277433
GOBP_NEGATIVE_REGULATION_OF_CELL_CYCLE_G2_M_PHASE_TRANSITION	-1.82176	0.00184154	0.00113726
GOBP_INTERSTRAND_CROSS_LINK_REPAIR	-1.81408	0.00461897	0.00285251
GOBP_CHONDROCYTE_DEVELOPMENT	-1.81386	0.00511726	0.00316023
GOBP_MITOCHONDRIAL_RESPIRATORY_CHAIN_COMPLEX_ASSEMBLY	-1.81253	0.000303708	0.000187559
GOBP_RRNA_MODIFICATION	-1.81128	0.00879256	0.00542996
GOBP_TRNA_MODIFICATION	-1.81029	0.000943767	0.000582836
GOBP_PURINE_NUCLEOBASE_BIOSYNTHETIC_PROCESS	-1.80978	0.00393661	0.0024311
GOBP_SNRNA_METABOLIC_PROCESS	-1.80789	0.00153164	0.000945882
GOBP_EMBRYONIC_CAMERA_TYPE_EYE_FORMATION	-1.80509	0.00417786	0.00258009
GOBP_ESTABLISHMENT_OF_MITOTIC_SPINDLE_LOCALIZATION	-1.80406	0.00378793	0.00233928
GOBP_GMP_BIOSYNTHETIC_PROCESS	-1.80386	0.00564237	0.00348452
GOBP_TRNA_METHYLATION	-1.80258	0.00526505	0.0032515
GOBP_CYTOKINESIS	-1.79898	7.2e-05	4.45e-05
GOBP_NEGATIVE_REGULATION_OF_CELL_CYCLE_PROCESS	-1.79761	7.89e-07	4.87e-07
GOBP_RESPONSE_TO_IONIZING_RADIATION	-1.79567	0.000159148	9.83e-05
GOBP_POSITIVE_REGULATION_OF_DNA_METABOLIC_PROCESS	-1.79336	1.99e-05	1.23e-05
GOBP_REGULATION_OF_UBIQUITIN_PROTEIN_TRANSFERASE_ACTIVITY	-1.79166	0.00190765	0.00117809
GOBP_CENTROSOME_SEPARATION	-1.79108	0.00581803	0.003593
GOBP_MITOCHONDRIAL_RNA_PROCESSING	-1.79087	0.00985618	0.00608681
GOBP_ENDONUCLEOLYTIC_CLEAVAGE_INVOLVED_IN_RRNA_PROCESSING	-1.79083	0.00586303	0.00362079
GOBP_MITOTIC_SISTER_CHROMATID_COHESION	-1.78877	0.0124044	0.00766051
GOBP_POSITIVE_REGULATION_OF_TELOMERE_MAINTENANCE_VIA_TELOMERE_LENGTHENING	-1.7874	0.0070209	0.00433584
GOBP_SNRNA_PROCESSING	-1.77873	0.011914	0.00735767
GOBP_REGULATION_OF_MITOCHONDRIAL_GENE_EXPRESSION	-1.77669	0.011289	0.00697166
GOBP_PROTEIN_LOCALIZATION_TO_MICROTUBULE_ORGANIZING_CENTER	-1.77583	0.00592208	0.00365726
GOBP_NOSE_DEVELOPMENT	-1.77351	0.00911021	0.00562613
GOBP_RESPIRATORY_CHAIN_COMPLEX_IV_ASSEMBLY	-1.77115	0.0047026	0.00290415
GOBP_NEGATIVE_REGULATION_OF_CELL_CYCLE_PHASE_TRANSITION	-1.7711	1.04e-05	6.45e-06
GOBP_SPINDLE_LOCALIZATION	-1.77085	0.0026197	0.00161783
GOBP_INNER_CELL_MASS_CELL_PROLIFERATION	-1.76071	0.00833753	0.00514895
GOBP_NEGATIVE_REGULATION_OF_DOUBLE_STRAND_BREAK_REPAIR_VIA_HOMOLOGOUS_RECOMBINATION	-1.76017	0.00833753	0.00514895
GOBP_MITOTIC_CYTOKINESIS	-1.75878	0.00186068	0.00114909
GOBP_FORMATION_OF_EXTRACHROMOSOMAL_CIRCULAR_DNA	-1.75567	0.0112987	0.00697766
GOBP_NUCLEOSOME_ASSEMBLY	-1.75331	0.00296444	0.00183073
GOBP_HISTONE_PHOSPHORYLATION	-1.75217	0.00634367	0.00391761
GOBP_MESENCHYMAL_TO_EPITHELIAL_TRANSITION	-1.74871	0.0104504	0.00645378
GOBP_CYTOSKELETON_DEPENDENT_CYTOKINESIS	-1.74425	0.00126066	0.000778536
GOBP_NEGATIVE_REGULATION_OF_MITOTIC_CELL_CYCLE_PHASE_TRANSITION	-1.73812	0.000115234	7.12e-05
GOBP_PROTEIN_LOCALIZATION_TO_CYTOSKELETON	-1.73249	0.00621129	0.00383586
GOBP_DNA_BIOSYNTHETIC_PROCESS	-1.7316	0.000108916	6.73e-05
GOBP_REGULATION_OF_SPINDLE_ASSEMBLY	-1.73147	0.01771	0.010937
GOBP_CHROMATIN_ASSEMBLY_OR_DISASSEMBLY	-1.73026	0.000326288	0.000201503
GOBP_POSITIVE_REGULATION_OF_RESPONSE_TO_DNA_DAMAGE_STIMULUS	-1.72661	0.00123118	0.000760329
GOBP_MITOTIC_RECOMBINATION	-1.7253	0.00909593	0.00561731
GOBP_BLASTOCYST_GROWTH	-1.72278	0.0119403	0.00737391
GOBP_HISTONE_MRNA_METABOLIC_PROCESS	-1.71827	0.0135451	0.00836496
GOBP_REGULATION_OF_SISTER_CHROMATID_COHESION	-1.71508	0.0180264	0.0111324
GOBP_POSTREPLICATION_REPAIR	-1.71102	0.022681	0.0140069
GOBP_PROTEIN_MONOUBIQUITINATION	-1.69628	0.00334992	0.00206878
GOBP_PROTEASOME_ASSEMBLY	-1.69399	0.02305	0.0142348
GOBP_PROTEIN_HYDROXYLATION	-1.69227	0.0216595	0.0133761
GOBP_REGULATION_OF_MEIOTIC_CELL_CYCLE	-1.69143	0.0086185	0.00532247
GOBP_MALE_MEIOTIC_NUCLEAR_DIVISION	-1.68486	0.00885008	0.00546548
GOBP_NEGATIVE_REGULATION_OF_DNA_RECOMBINATION	-1.68202	0.0175777	0.0108553
GOBP_EMBRYONIC_CRANIAL_SKELETON_MORPHOGENESIS	-1.68153	0.012702	0.0078443
GOBP_NADH_DEHYDROGENASE_COMPLEX_ASSEMBLY	-1.67977	0.00747734	0.00461773
GOBP_POSITIVE_REGULATION_OF_UBIQUITIN_PROTEIN_TRANSFERASE_ACTIVITY	-1.67742	0.0254505	0.0157173
GOBP_POSITIVE_REGULATION_OF_DOUBLE_STRAND_BREAK_REPAIR_VIA_HOMOLOGOUS_RECOMBINATION	-1.6766	0.0137705	0.00850415
GOBP_SPINDLE_MIDZONE_ASSEMBLY	-1.67513	0.0269668	0.0166537
GOBP_NEGATIVE_REGULATION_OF_RESPONSE_TO_DNA_DAMAGE_STIMULUS	-1.67353	0.00436575	0.00269613
GOBP_REGULATION_OF_TRANSLATIONAL_FIDELITY	-1.67344	0.0397988	0.0245783
GOBP_FAT_SOLUBLE_VITAMIN_CATABOLIC_PROCESS	-1.6712	0.0234195	0.014463
GOBP_POSITIVE_REGULATION_OF_CYTOKINESIS	-1.66935	0.0108684	0.00671191
GOBP_NEGATIVE_REGULATION_OF_MITOTIC_CELL_CYCLE	-1.66649	0.000141957	8.77e-05
GOBP_AMINO_ACID_ACTIVATION	-1.66631	0.024158	0.0149191
GOBP_VITAMIN_CATABOLIC_PROCESS	-1.6616	0.0429425	0.0265197
GOBP_REGULATION_OF_MEIOTIC_NUCLEAR_DIVISION	-1.6557	0.0201546	0.0124467
GOBP_TELOMERE_MAINTENANCE_VIA_RECOMBINATION	-1.6458	0.0295889	0.018273
GOBP_CYTOKINETIC_PROCESS	-1.63498	0.0249647	0.0154173
GOBP_EYELID_DEVELOPMENT_IN_CAMERA_TYPE_EYE	-1.63052	0.0311057	0.0192097
GOBP_METANEPHRIC_RENAL_VESICLE_MORPHOGENESIS	-1.62503	0.0337681	0.020854
GOBP_NEGATIVE_REGULATION_OF_UBIQUITIN_PROTEIN_TRANSFERASE_ACTIVITY	-1.62361	0.0332919	0.0205598
GOBP_CELLULAR_RESPONSE_TO_IONIZING_RADIATION	-1.61992	0.0116364	0.00718621
GOBP_RESOLUTION_OF_MEIOTIC_RECOMBINATION_INTERMEDIATES	-1.61866	0.0471174	0.0290979
GOBP_RRNA_METHYLATION	-1.61365	0.035002	0.0216159
GOBP_NUCLEOBASE_METABOLIC_PROCESS	-1.60816	0.0287819	0.0177746
GOBP_RNA_MODIFICATION	-1.60604	0.00174001	0.00107457
GOBP_SYNAPTONEMAL_COMPLEX_ORGANIZATION	-1.60104	0.027197	0.0167959
GOBP_REGULATION_OF_DNA_RECOMBINATION	-1.59628	0.00447691	0.00276477
GOBP_MITOCHONDRIAL_TRNA_PROCESSING	-1.58694	0.064974	0.0401255
GOBP_POSITIVE_REGULATION_OF_DNA_BIOSYNTHETIC_PROCESS	-1.5832	0.012668	0.00782329
GOBP_DOUBLE_STRAND_BREAK_REPAIR_VIA_NONHOMOLOGOUS_END_JOINING	-1.57148	0.0227134	0.014027
GOBP_PEPTIDYL_PROLINE_MODIFICATION	-1.56212	0.0251108	0.0155075
GOBP_REGULATION_OF_MITOTIC_SPINDLE_ASSEMBLY	-1.55124	0.0712883	0.044025
GOBP_CENTRIOLE_ASSEMBLY	-1.5486	0.0365177	0.022552
GOBP_COLLAGEN_CATABOLIC_PROCESS	-1.54506	0.0375781	0.0232068
GOBP_NEGATIVE_REGULATION_OF_CELL_CYCLE	-1.54204	0.000129758	8.01e-05
GOBP_NEGATIVE_REGULATION_OF_CELL_AGING	-1.53857	0.0658519	0.0406677
GOBP_REGULATION_OF_CYCLIN_DEPENDENT_PROTEIN_KINASE_ACTIVITY	-1.53734	0.00595698	0.00367881
GOBP_REGULATION_OF_CENTRIOLE_REPLICATION	-1.53688	0.0717626	0.0443179
GOBP_CHONDROCYTE_DIFFERENTIATION	-1.49971	0.0191468	0.0118244
GOBP_REGULATION_OF_DNA_BIOSYNTHETIC_PROCESS	-1.48684	0.0141056	0.00871111
GOBP_POSITIVE_REGULATION_OF_NUCLEAR_DIVISION	-1.4821	0.0574302	0.0354667
GOBP_NUCLEOSIDE_MONOPHOSPHATE_METABOLIC_PROCESS	-1.47061	0.0410046	0.0253229
GOBP_CELLULAR_RESPONSE_TO_RADIATION	-1.46896	0.00787653	0.00486425
GOBP_SKELETAL_SYSTEM_MORPHOGENESIS	-1.46632	0.0047547	0.00293633
GOBP_REGULATION_OF_SIGNAL_TRANSDUCTION_BY_P53_CLASS_MEDIATOR	-1.45166	0.023428	0.0144683
GOBP_POSITIVE_REGULATION_OF_MITOTIC_NUCLEAR_DIVISION	-1.44938	0.0582451	0.03597
GOBP_MICROTUBULE_DEPOLYMERIZATION	-1.43988	0.075081	0.0463672
GOBP_SIGNAL_TRANSDUCTION_BY_P53_CLASS_MEDIATOR	-1.43743	0.0149531	0.00923448
GOBP_DNA_METHYLATION	-1.43255	0.056475	0.0348769
GOBP_NUCLEIC_ACID_PHOSPHODIESTER_BOND_HYDROLYSIS	-1.41499	0.0110796	0.00684237
GOBP_RNA_PHOSPHODIESTER_BOND_HYDROLYSIS_ENDONUCLEOLYTIC	-1.40002	0.0683554	0.0422137
GOBP_CELL_AGING	-1.39457	0.0469023	0.0289651
GOBP_FEMALE_GAMETE_GENERATION	-1.39129	0.0188119	0.0116175
GOBP_CARTILAGE_DEVELOPMENT	-1.38901	0.0308571	0.0190562
GOBP_ESTABLISHMENT_OF_ORGANELLE_LOCALIZATION	-1.37592	0.00645818	0.00398833
GOBP_MICROTUBULE_POLYMERIZATION_OR_DEPOLYMERIZATION	-1.37068	0.0459949	0.0284048
GOBP_METHYLATION	-1.3585	0.0124702	0.00770114
GOBP_REGULATION_OF_CELL_DIVISION	-1.3575	0.0277093	0.0171122
GOBP_REGULATION_OF_MICROTUBULE_BASED_PROCESS	-1.35421	0.0274978	0.0169816
GOBP_EMBRYONIC_ORGAN_MORPHOGENESIS	-1.34251	0.021868	0.0135049
GOBP_EAR_MORPHOGENESIS	-1.33693	0.0688613	0.0425261
GOBP_APPENDAGE_DEVELOPMENT	-1.32334	0.0459664	0.0283871
GOBP_CELL_CYCLE_G1_S_PHASE_TRANSITION	-1.31287	0.0369457	0.0228163
GOBP_NEGATIVE_REGULATION_OF_ORGANELLE_ORGANIZATION	-1.30452	0.0297694	0.0183844
GOBP_REGULATION_OF_CELL_DEVELOPMENT	1.3067	0.0415298	0.0256473
GOBP_NEURON_PROJECTION_GUIDANCE	1.3371	0.0673311	0.0415812
GOBP_AXON_DEVELOPMENT	1.34191	0.0332919	0.0205598
GOBP_EXTERNAL_ENCAPSULATING_STRUCTURE_ORGANIZATION	1.34821	0.0416207	0.0257034
GOBP_STEM_CELL_DIFFERENTIATION	1.35452	0.0629032	0.0388466
GOBP_CELL_GROWTH	1.35919	0.0191691	0.0118381
GOBP_CELL_CELL_SIGNALING_BY_WNT	1.36216	0.0229341	0.0141633
GOBP_REGULATION_OF_CELL_JUNCTION_ASSEMBLY	1.37322	0.0677768	0.0418565
GOBP_REGULATION_OF_WNT_SIGNALING_PATHWAY	1.37435	0.0260113	0.0160636
GOBP_RESPONSE_TO_EXTRACELLULAR_STIMULUS	1.37617	0.0146327	0.00903658
GOBP_REGULATION_OF_CANONICAL_WNT_SIGNALING_PATHWAY	1.38608	0.0409668	0.0252996
GOBP_POSITIVE_REGULATION_OF_CELL_PROJECTION_ORGANIZATION	1.39478	0.0188125	0.0116179
GOBP_PROTEIN_MATURATION	1.39551	0.0248274	0.0153325
GOBP_NEGATIVE_REGULATION_OF_PROTEIN_MODIFICATION_PROCESS	1.41148	0.00574028	0.00354498
GOBP_REGULATION_OF_DEVELOPMENTAL_GROWTH	1.41623	0.0159015	0.00982019
GOBP_NEURON_DEATH	1.41629	0.0133321	0.0082334
GOBP_CANONICAL_WNT_SIGNALING_PATHWAY	1.41851	0.0168612	0.0104128
GOBP_INTRACELLULAR_RECEPTOR_SIGNALING_PATHWAY	1.42091	0.0250282	0.0154565
GOBP_MESENCHYME_DEVELOPMENT	1.43551	0.0191468	0.0118244
GOBP_MORPHOGENESIS_OF_A_BRANCHING_STRUCTURE	1.43626	0.032427	0.0200257
GOBP_CELL_CELL_JUNCTION_ORGANIZATION	1.44106	0.0361577	0.0223296
GOBP_REGULATION_OF_SMALL_MOLECULE_METABOLIC_PROCESS	1.44252	0.0113621	0.00701682
GOBP_CELL_JUNCTION_ASSEMBLY	1.44525	0.00799156	0.00493529
GOBP_MESENCHYMAL_CELL_DIFFERENTIATION	1.44777	0.0208945	0.0129037
GOBP_CELL_SUBSTRATE_JUNCTION_ORGANIZATION	1.45389	0.0399124	0.0246484
GOBP_REGULATION_OF_RELEASE_OF_SEQUESTERED_CALCIUM_ION_INTO_CYTOSOL	1.45753	0.0519419	0.0320774
GOBP_MULTI_MULTICELLULAR_ORGANISM_PROCESS	1.45844	0.0187472	0.0115776
GOBP_CELLULAR_RESPONSE_TO_INSULIN_STIMULUS	1.45876	0.027117	0.0167465
GOBP_DIGESTIVE_SYSTEM_DEVELOPMENT	1.46065	0.0342591	0.0211571
GOBP_REGULATION_OF_POTASSIUM_ION_TRANSPORT	1.4633	0.0357525	0.0220794
GOBP_ISOPRENOID_METABOLIC_PROCESS	1.46355	0.0476101	0.0294022
GOBP_ORGANIC_HYDROXY_COMPOUND_BIOSYNTHETIC_PROCESS	1.46373	0.0175252	0.0108229
GOBP_FOCAL_ADHESION_ASSEMBLY	1.46751	0.06444	0.0397957
GOBP_STEROID_BIOSYNTHETIC_PROCESS	1.46881	0.0256582	0.0158456
GOBP_CELL_CELL_JUNCTION_ASSEMBLY	1.47042	0.023428	0.0144683
GOBP_POSITIVE_REGULATION_OF_CELLULAR_COMPONENT_BIOGENESIS	1.47068	0.00148508	0.000917131
GOBP_REGULATION_OF_TRANSMEMBRANE_RECEPTOR_PROTEIN_SERINE_THREONINE_KINASE_SIGNALING_PATHWAY	1.47387	0.0103141	0.0063696
GOBP_CARDIAC_MUSCLE_CELL_ACTION_POTENTIAL	1.47459	0.0415298	0.0256473
GOBP_NEGATIVE_REGULATION_OF_ION_TRANSMEMBRANE_TRANSPORT	1.47469	0.0380982	0.023528
GOBP_NEGATIVE_REGULATION_OF_NEURON_DEATH	1.4758	0.0143346	0.00885251
GOBP_IMPORT_ACROSS_PLASMA_MEMBRANE	1.47669	0.0339838	0.0209871
GOBP_REGULATION_OF_TRANS_SYNAPTIC_SIGNALING	1.47697	0.00258862	0.00159863
GOBP_CELLULAR_RESPONSE_TO_EXTERNAL_STIMULUS	1.47819	0.0115695	0.00714489
GOBP_ANTIMICROBIAL_HUMORAL_IMMUNE_RESPONSE_MEDIATED_BY_ANTIMICROBIAL_PEPTIDE	1.47832	0.0539572	0.033322
GOBP_ACTION_POTENTIAL	1.47842	0.0247547	0.0152876
GOBP_CELLULAR_RESPONSE_TO_PEPTIDE_HORMONE_STIMULUS	1.47926	0.00619778	0.00382752
GOBP_AMIDE_TRANSPORT	1.48114	0.011009	0.00679873
GOBP_VASOCONSTRICTION	1.48241	0.0415298	0.0256473
GOBP_TRANSMEMBRANE_RECEPTOR_PROTEIN_SERINE_THREONINE_KINASE_SIGNALING_PATHWAY	1.4842	0.00696725	0.00430271
GOBP_MEMBRANE_INVAGINATION	1.48789	0.02305	0.0142348
GOBP_TERPENOID_METABOLIC_PROCESS	1.48818	0.0319959	0.0197595
GOBP_PLATELET_AGGREGATION	1.48853	0.0477404	0.0294827
GOBP_RECEPTOR_METABOLIC_PROCESS	1.48942	0.018849	0.0116405
GOBP_REGULATION_OF_RECEPTOR_SIGNALING_PATHWAY_VIA_STAT	1.48958	0.0324802	0.0200586
GOBP_RESPONSE_TO_PEPTIDE_HORMONE	1.49347	0.00428653	0.0026472
GOBP_SMOOTH_MUSCLE_CONTRACTION	1.49513	0.04098	0.0253077
GOBP_NEGATIVE_REGULATION_OF_KINASE_ACTIVITY	1.49674	0.0112782	0.00696502
GOBP_CELLULAR_RESPONSE_TO_STEROID_HORMONE_STIMULUS	1.49873	0.0158556	0.00979181
GOBP_NEGATIVE_REGULATION_OF_SUPRAMOLECULAR_FIBER_ORGANIZATION	1.50071	0.0206976	0.012782
GOBP_REGULATION_OF_CELL_MORPHOGENESIS	1.50076	0.00364378	0.00225026
GOBP_VENTRICULAR_SEPTUM_DEVELOPMENT	1.50373	0.0741684	0.0458036
GOBP_HORMONE_MEDIATED_SIGNALING_PATHWAY	1.50403	0.0219527	0.0135571
GOBP_GLIAL_CELL_DIFFERENTIATION	1.50553	0.0108517	0.00670158
GOBP_BRANCHING_MORPHOGENESIS_OF_AN_EPITHELIAL_TUBE	1.50602	0.0243629	0.0150456
GOBP_RESPONSE_TO_INSULIN	1.50743	0.00717869	0.00443329
GOBP_REGULATION_OF_HEART_RATE	1.50753	0.0216595	0.0133761
GOBP_REGULATION_OF_CELLULAR_COMPONENT_SIZE	1.50978	0.0049701	0.00306935
GOBP_PROTEIN_LOCALIZATION_TO_EXTRACELLULAR_REGION	1.51049	0.00378793	0.00233928
GOBP_ACTIN_FILAMENT_BASED_MOVEMENT	1.51078	0.0171162	0.0105703
GOBP_POSITIVE_REGULATION_OF_EPITHELIAL_CELL_PROLIFERATION	1.51502	0.0135888	0.00839191
GOBP_REGULATION_OF_MEMBRANE_POTENTIAL	1.51511	0.00183289	0.00113193
GOBP_CELLULAR_COMPONENT_ASSEMBLY_INVOLVED_IN_MORPHOGENESIS	1.51578	0.0237947	0.0146947
GOBP_HEART_GROWTH	1.51712	0.0277895	0.0171617
GOBP_GLAND_MORPHOGENESIS	1.51772	0.037163	0.0229505
GOBP_METANEPHROS_DEVELOPMENT	1.5182	0.0224445	0.0138609
GOBP_IMPORT_INTO_CELL	1.51954	0.00711637	0.0043948
GOBP_MAINTENANCE_OF_LOCATION_IN_CELL	1.52059	0.00861464	0.00532008
GOBP_HEART_VALVE_MORPHOGENESIS	1.52147	0.0525992	0.0324833
GOBP_NEGATIVE_REGULATION_OF_T_CELL_APOPTOTIC_PROCESS	1.52148	0.0796975	0.0492182
GOBP_NEGATIVE_REGULATION_OF_ACTIN_FILAMENT_BUNDLE_ASSEMBLY	1.52157	0.0806147	0.0497847
GOBP_CARDIAC_MUSCLE_CELL_ACTION_POTENTIAL_INVOLVED_IN_CONTRACTION	1.52182	0.0469511	0.0289953
GOBP_NEGATIVE_REGULATION_OF_GROWTH	1.52246	0.00941886	0.00581674
GOBP_ORGANIC_ACID_TRANSPORT	1.5232	0.00310327	0.00191647
GOBP_REGULATION_OF_FAT_CELL_DIFFERENTIATION	1.52422	0.0223084	0.0137769
GOBP_PHOSPHATIDYLCHOLINE_CATABOLIC_PROCESS	1.52554	0.0760637	0.0469741
GOBP_POSITIVE_REGULATION_OF_TYROSINE_PHOSPHORYLATION_OF_STAT_PROTEIN	1.52618	0.0404381	0.0249731
GOBP_NEPHRON_DEVELOPMENT	1.52631	0.0193171	0.0119295
GOBP_NEGATIVE_REGULATION_OF_PHOSPHORYLATION	1.52691	0.00344199	0.00212565
GOBP_POSITIVE_REGULATION_OF_HEART_GROWTH	1.52692	0.0685578	0.0423387
GOBP_RESPONSE_TO_OSMOTIC_STRESS	1.527	0.0386087	0.0238433
GOBP_RESPONSE_TO_METAL_ION	1.5271	0.002163	0.00133579
GOBP_HEAT_GENERATION	1.52724	0.0760637	0.0469741
GOBP_STRIATED_MUSCLE_CONTRACTION	1.52846	0.00909432	0.00561631
GOBP_CARDIAC_SEPTUM_DEVELOPMENT	1.52932	0.0158702	0.00980087
GOBP_PHAGOCYTOSIS_RECOGNITION	1.52949	0.0244916	0.0151251
GOBP_NEGATIVE_REGULATION_OF_ION_TRANSPORT	1.52964	0.0113621	0.00701682
GOBP_CELLULAR_MODIFIED_AMINO_ACID_METABOLIC_PROCESS	1.53006	0.0167736	0.0103587
GOBP_NEGATIVE_REGULATION_OF_DEVELOPMENTAL_GROWTH	1.53019	0.0222608	0.0137475
GOBP_REGULATION_OF_CELL_MATRIX_ADHESION	1.53099	0.0294052	0.0181595
GOBP_REGULATION_OF_ENDOCYTIC_RECYCLING	1.53186	0.0742301	0.0458417
GOBP_NEGATIVE_REGULATION_OF_PHOSPHORUS_METABOLIC_PROCESS	1.53197	0.0007531	0.000465086
GOBP_CELLULAR_RESPONSE_TO_TOXIC_SUBSTANCE	1.53223	0.0293058	0.0180982
GOBP_EPITHELIAL_TUBE_MORPHOGENESIS	1.53254	0.00336453	0.00207781
GOBP_REGULATION_OF_CELLULAR_RESPONSE_TO_GROWTH_FACTOR_STIMULUS	1.53319	0.00319357	0.00197223
GOBP_REGULATION_OF_PEROXISOME_PROLIFERATOR_ACTIVATED_RECEPTOR_SIGNALING_PATHWAY	1.53453	0.0453793	0.0280246
GOBP_REGULATION_OF_CELL_PROJECTION_ASSEMBLY	1.53532	0.00699093	0.00431734
GOBP_NEGATIVE_REGULATION_OF_TRANSMEMBRANE_TRANSPORT	1.53635	0.0149522	0.00923392
GOBP_MAINTENANCE_OF_LOCATION	1.53756	0.00166021	0.00102528
GOBP_NEGATIVE_REGULATION_OF_MULTICELLULAR_ORGANISM_GROWTH	1.53784	0.0584297	0.036084
GOBP_INTEGRIN_MEDIATED_SIGNALING_PATHWAY	1.53953	0.0185085	0.0114301
GOBP_COGNITION	1.54034	0.00414503	0.00255982
GOBP_MEMORY	1.54035	0.0206976	0.012782
GOBP_PROTEIN_PROCESSING	1.5411	0.00654441	0.00404158
GOBP_HEART_FIELD_SPECIFICATION	1.54154	0.0790222	0.0488012
GOBP_REGULATION_OF_VASCULAR_PERMEABILITY	1.54299	0.056475	0.0348769
GOBP_DEVELOPMENTAL_MATURATION	1.54352	0.00395199	0.0024406
GOBP_POSITIVE_REGULATION_OF_GLUCOSE_TRANSMEMBRANE_TRANSPORT	1.5439	0.0508289	0.03139
GOBP_RETINOL_METABOLIC_PROCESS	1.54639	0.051358	0.0317168
GOBP_NEGATIVE_REGULATION_OF_PROTEIN_SERINE_THREONINE_KINASE_ACTIVITY	1.54696	0.026781	0.0165389
GOBP_CELL_ADHESION_MEDIATED_BY_INTEGRIN	1.54954	0.0284646	0.0175787
GOBP_LOCOMOTORY_EXPLORATION_BEHAVIOR	1.54969	0.0434024	0.0268037
GOBP_CARDIAC_MUSCLE_CONTRACTION	1.55003	0.0181116	0.0111851
GOBP_REGULATION_OF_MUSCLE_SYSTEM_PROCESS	1.55054	0.00466584	0.00288145
GOBP_REGULATION_OF_PROTEIN_DEPHOSPHORYLATION	1.55134	0.0207092	0.0127892
GOBP_FATTY_ACID_DERIVATIVE_METABOLIC_PROCESS	1.55189	0.0254505	0.0157173
GOBP_CELL_JUNCTION_DISASSEMBLY	1.55199	0.0707824	0.0437126
GOBP_RESPONSE_TO_XENOBIOTIC_STIMULUS	1.55214	0.000685074	0.000423076
GOBP_RESPONSE_TO_MECHANICAL_STIMULUS	1.55214	0.0069096	0.00426711
GOBP_NEGATIVE_REGULATION_OF_TRANSPORTER_ACTIVITY	1.55332	0.0167613	0.0103512
GOBP_ORGANIC_ACID_BIOSYNTHETIC_PROCESS	1.55346	0.00171564	0.00105952
GOBP_ENDOCARDIAL_CUSHION_MORPHOGENESIS	1.55356	0.0454651	0.0280775
GOBP_POSITIVE_REGULATION_OF_PROTEIN_KINASE_B_SIGNALING	1.55413	0.016778	0.0103615
GOBP_POSITIVE_REGULATION_OF_PROTEIN_SERINE_THREONINE_KINASE_ACTIVITY	1.55659	0.00752505	0.00464719
GOBP_REGULATION_OF_MUSCLE_CONTRACTION	1.55708	0.0106025	0.00654769
GOBP_REGULATION_OF_HORMONE_LEVELS	1.55737	0.000234203	0.000144635
GOBP_POSITIVE_REGULATION_OF_ENDOTHELIAL_CELL_PROLIFERATION	1.55765	0.0177678	0.0109727
GOBP_HETEROPHILIC_CELL_CELL_ADHESION_VIA_PLASMA_MEMBRANE_CELL_ADHESION_MOLECULES	1.5587	0.0471555	0.0291215
GOBP_REGULATION_OF_SODIUM_ION_TRANSMEMBRANE_TRANSPORT	1.5588	0.0229281	0.0141595
GOBP_GLIAL_CELL_DEVELOPMENT	1.55917	0.0144536	0.008926
GOBP_LOW_DENSITY_LIPOPROTEIN_PARTICLE_REMODELING	1.55918	0.0652597	0.0403019
GOBP_TIGHT_JUNCTION_ORGANIZATION	1.56096	0.0218738	0.0135085
GOBP_SODIUM_ION_TRANSPORT	1.56151	0.00236665	0.00146155
GOBP_PIGMENT_CELL_DIFFERENTIATION	1.56366	0.0465113	0.0287236
GOBP_REGULATION_OF_CATION_CHANNEL_ACTIVITY	1.56406	0.0110723	0.00683785
GOBP_REGULATION_OF_CELLULAR_RESPONSE_TO_TRANSFORMING_GROWTH_FACTOR_BETA_STIMULUS	1.56475	0.0147588	0.00911451
GOBP_CELLULAR_SODIUM_ION_HOMEOSTASIS	1.56493	0.0604706	0.0373444
GOBP_MEMBRANE_HYPERPOLARIZATION	1.565	0.0476152	0.0294054
GOBP_REGULATION_OF_REACTIVE_OXYGEN_SPECIES_METABOLIC_PROCESS	1.56552	0.014635	0.00903803
GOBP_REGULATION_OF_ACTOMYOSIN_STRUCTURE_ORGANIZATION	1.56717	0.0146327	0.00903658
GOBP_REACTIVE_OXYGEN_SPECIES_BIOSYNTHETIC_PROCESS	1.56727	0.0380815	0.0235177
GOBP_VASCULAR_TRANSPORT	1.56766	0.0184534	0.0113961
GOBP_CARDIAC_MUSCLE_CELL_PROLIFERATION	1.56894	0.0332919	0.0205598
GOBP_POSITIVE_REGULATION_OF_TRANSMEMBRANE_RECEPTOR_PROTEIN_SERINE_THREONINE_KINASE_SIGNALING_PATHWAY	1.56894	0.0206915	0.0127783
GOBP_SODIUM_ION_EXPORT_ACROSS_PLASMA_MEMBRANE	1.56973	0.036855	0.0227603
GOBP_RESPONSE_TO_FIBROBLAST_GROWTH_FACTOR	1.57027	0.0206915	0.0127783
GOBP_POSITIVE_REGULATION_OF_VASCULATURE_DEVELOPMENT	1.57077	0.00643477	0.00397387
GOBP_DETOXIFICATION	1.57082	0.00969154	0.00598513
GOBP_RESPONSE_TO_SALT_STRESS	1.57157	0.0425741	0.0262922
GOBP_CELL_MATURATION	1.57216	0.00833552	0.00514771
GOBP_RESPONSE_TO_PEPTIDE	1.57249	0.00018756	0.00011583
GOBP_NEURON_REMODELING	1.57256	0.0340361	0.0210195
GOBP_APICAL_JUNCTION_ASSEMBLY	1.57309	0.0182807	0.0112895
GOBP_SULFUR_COMPOUND_METABOLIC_PROCESS	1.57416	0.00119926	0.000740617
GOBP_REGENERATION	1.57472	0.00549977	0.00339645
GOBP_CARBOXYLIC_ACID_TRANSPORT	1.57505	0.00274788	0.00169699
GOBP_CELLULAR_HORMONE_METABOLIC_PROCESS	1.57524	0.00947353	0.0058505
GOBP_CELLULAR_ALDEHYDE_METABOLIC_PROCESS	1.57595	0.0214691	0.0132585
GOBP_REGULATION_OF_PROTEIN_SECRETION	1.57598	0.00271841	0.00167879
GOBP_POSITIVE_REGULATION_OF_NATURAL_KILLER_CELL_MEDIATED_IMMUNITY	1.57658	0.0486905	0.0300695
GOBP_METAL_ION_EXPORT	1.57724	0.0395653	0.024434
GOBP_POSITIVE_REGULATION_OF_CYTOSOLIC_CALCIUM_ION_CONCENTRATION_INVOLVED_IN_PHOSPHOLIPASE_C_ACTIVATING_G_PROTEIN_COUPLED_SIGNALING_PATHWAY	1.57756	0.0486905	0.0300695
GOBP_STRIATED_MUSCLE_CELL_PROLIFERATION	1.57974	0.0349517	0.0215849
GOBP_INNATE_IMMUNE_RESPONSE_IN_MUCOSA	1.58441	0.0540797	0.0333976
GOBP_REGULATION_OF_SMOOTH_MUSCLE_CONTRACTION	1.58487	0.0364783	0.0225277
GOBP_POSITIVE_REGULATION_OF_ION_TRANSMEMBRANE_TRANSPORT	1.58518	0.00660077	0.00407639
GOBP_CELLULAR_RESPONSE_TO_GROWTH_HORMONE_STIMULUS	1.58657	0.0473969	0.0292705
GOBP_REGULATION_OF_PROTEIN_LOCALIZATION_TO_CELL_SURFACE	1.58662	0.0350908	0.0216708
GOBP_REGULATION_OF_LIPID_CATABOLIC_PROCESS	1.58686	0.0406216	0.0250864
GOBP_INOSITOL_PHOSPHATE_MEDIATED_SIGNALING	1.5875	0.0333505	0.020596
GOBP_ANATOMICAL_STRUCTURE_MATURATION	1.58755	0.00296954	0.00183388
GOBP_REGULATION_OF_CELL_SUBSTRATE_ADHESION	1.58777	0.00340094	0.00210029
GOBP_HEART_MORPHOGENESIS	1.58808	0.00114206	0.000705292
GOBP_TRIGLYCERIDE_CATABOLIC_PROCESS	1.58812	0.0459949	0.0284048
GOBP_POTASSIUM_ION_TRANSPORT	1.58839	0.00236505	0.00146057
GOBP_TRACHEA_MORPHOGENESIS	1.58858	0.0275382	0.0170066
GOBP_OUTFLOW_TRACT_SEPTUM_MORPHOGENESIS	1.58872	0.0446147	0.0275524
GOBP_VENTRICULAR_SEPTUM_MORPHOGENESIS	1.58881	0.0454505	0.0280685
GOBP_REGULATION_OF_JUN_KINASE_ACTIVITY	1.58881	0.0342591	0.0211571
GOBP_REGULATION_OF_ACTIN_CYTOSKELETON_REORGANIZATION	1.58937	0.0507941	0.0313685
GOBP_CELL_COMMUNICATION_INVOLVED_IN_CARDIAC_CONDUCTION	1.58941	0.0342591	0.0211571
GOBP_ASTROCYTE_DIFFERENTIATION	1.58942	0.0208609	0.0128829
GOBP_UROGENITAL_SYSTEM_DEVELOPMENT	1.58946	0.000510968	0.000315555
GOBP_POSITIVE_REGULATION_OF_LEUKOCYTE_TETHERING_OR_ROLLING	1.59002	0.0383754	0.0236992
GOBP_NEGATIVE_REGULATION_OF_PEPTIDASE_ACTIVITY	1.59005	0.00114278	0.000705736
GOBP_OSTEOCLAST_DEVELOPMENT	1.5902	0.0536067	0.0331055
GOBP_NEGATIVE_REGULATION_OF_COAGULATION	1.59178	0.0267493	0.0165194
GOBP_NEGATIVE_REGULATION_OF_FIBRINOLYSIS	1.59319	0.0244364	0.015091
GOBP_CARBOHYDRATE_HOMEOSTASIS	1.59335	0.00269417	0.00166382
GOBP_REGULATION_OF_PHOSPHOPROTEIN_PHOSPHATASE_ACTIVITY	1.59337	0.0312388	0.0192919
GOBP_POSITIVE_REGULATION_OF_NATURAL_KILLER_CELL_MEDIATED_CYTOTOXICITY	1.59434	0.0428811	0.0264818
GOBP_LOW_DENSITY_LIPOPROTEIN_PARTICLE_CLEARANCE	1.59463	0.0470013	0.0290263
GOBP_EXPLORATION_BEHAVIOR	1.59521	0.0428811	0.0264818
GOBP_POSITIVE_REGULATION_OF_SUPRAMOLECULAR_FIBER_ORGANIZATION	1.59557	0.00549977	0.00339645
GOBP_BROWN_FAT_CELL_DIFFERENTIATION	1.59593	0.0339206	0.0209481
GOBP_DEPHOSPHORYLATION	1.5963	0.000353001	0.000218
GOBP_ACTOMYOSIN_STRUCTURE_ORGANIZATION	1.59635	0.00497534	0.00307259
GOBP_HYDROGEN_PEROXIDE_BIOSYNTHETIC_PROCESS	1.59637	0.0327801	0.0202438
GOBP_REGULATION_OF_CALCIUM_ION_TRANSMEMBRANE_TRANSPORTER_ACTIVITY	1.59716	0.0144335	0.00891357
GOBP_SECONDARY_ALCOHOL_METABOLIC_PROCESS	1.59752	0.00982456	0.00606728
GOBP_LIPOXYGENASE_PATHWAY	1.59776	0.0359704	0.022214
GOBP_MUSCLE_CONTRACTION	1.59777	0.000422185	0.000260726
GOBP_REGULATION_OF_HEART_CONTRACTION	1.59825	0.00401077	0.0024769
GOBP_NEGATIVE_REGULATION_OF_IMMUNOGLOBULIN_PRODUCTION	1.5986	0.035002	0.0216159
GOBP_TRANSEPITHELIAL_TRANSPORT	1.5992	0.0425741	0.0262922
GOBP_NEGATIVE_REGULATION_OF_CELL_JUNCTION_ASSEMBLY	1.59956	0.0440246	0.0271879
GOBP_VASCULAR_ASSOCIATED_SMOOTH_MUSCLE_CELL_PROLIFERATION	1.59974	0.0140574	0.00868131
GOBP_POSITIVE_REGULATION_OF_LIPID_BIOSYNTHETIC_PROCESS	1.60136	0.0206976	0.012782
GOBP_SEGMENT_SPECIFICATION	1.60153	0.0327801	0.0202438
GOBP_NEUTROPHIL_MEDIATED_CYTOTOXICITY	1.60161	0.0352796	0.0217874
GOBP_SODIUM_ION_TRANSMEMBRANE_TRANSPORT	1.6027	0.00486295	0.00300318
GOBP_EPITHELIAL_CELL_APOPTOTIC_PROCESS	1.60327	0.00969154	0.00598513
GOBP_PROSTANOID_BIOSYNTHETIC_PROCESS	1.60367	0.0424617	0.0262227
GOBP_GLIOGENESIS	1.60389	0.00155769	0.000961973
GOBP_CELLULAR_RESPONSE_TO_INTERLEUKIN_1	1.60411	0.00935191	0.00577539
GOBP_CELLULAR_KETONE_METABOLIC_PROCESS	1.60433	0.00287863	0.00177774
GOBP_REGULATION_OF_OSTEOCLAST_DEVELOPMENT	1.60515	0.0339967	0.0209951
GOBP_LIPID_OXIDATION	1.60541	0.00887608	0.00548154
GOBP_ADAPTIVE_THERMOGENESIS	1.60624	0.00682464	0.00421464
GOBP_POSITIVE_REGULATION_OF_COLD_INDUCED_THERMOGENESIS	1.60632	0.0100174	0.00618637
GOBP_HORMONE_METABOLIC_PROCESS	1.60652	0.00128839	0.000795661
GOBP_NEGATIVE_REGULATION_OF_RESPONSE_TO_WOUNDING	1.60702	0.0113621	0.00701682
GOBP_HUMORAL_IMMUNE_RESPONSE_MEDIATED_BY_CIRCULATING_IMMUNOGLOBULIN	1.60712	0.0090652	0.00559833
GOBP_RENAL_SYSTEM_VASCULATURE_DEVELOPMENT	1.60714	0.0561611	0.034683
GOBP_NEPHRIC_DUCT_DEVELOPMENT	1.60798	0.0452044	0.0279165
GOBP_POSITIVE_REGULATION_OF_INFLAMMATORY_RESPONSE_TO_ANTIGENIC_STIMULUS	1.60818	0.0328886	0.0203108
GOBP_ORGANIC_ANION_TRANSPORT	1.60868	0.000326674	0.000201742
GOBP_NEGATIVE_REGULATION_OF_MYELOID_CELL_DIFFERENTIATION	1.60905	0.0140438	0.00867294
GOBP_RAS_PROTEIN_SIGNAL_TRANSDUCTION	1.60994	0.000590957	0.000364953
GOBP_MAMMARY_GLAND_MORPHOGENESIS	1.61064	0.0323325	0.0199673
GOBP_EPITHELIAL_CELL_PROLIFERATION	1.61067	0.000121903	7.53e-05
GOBP_AMINE_METABOLIC_PROCESS	1.6113	0.0135832	0.00838849
GOBP_MEMBRANE_DEPOLARIZATION_DURING_CARDIAC_MUSCLE_CELL_ACTION_POTENTIAL	1.61184	0.0426927	0.0263654
GOBP_ESTABLISHMENT_OF_LYMPHOCYTE_POLARITY	1.61228	0.0219901	0.0135803
GOBP_CELLULAR_GLUCOSE_HOMEOSTASIS	1.61371	0.00423312	0.00261422
GOBP_MUSCLE_SYSTEM_PROCESS	1.61536	7.4e-05	4.57e-05
GOBP_CELL_COMMUNICATION_BY_ELECTRICAL_COUPLING_INVOLVED_IN_CARDIAC_CONDUCTION	1.61654	0.030773	0.0190042
GOBP_SMAD_PROTEIN_SIGNAL_TRANSDUCTION	1.61663	0.0174627	0.0107843
GOBP_OUTFLOW_TRACT_MORPHOGENESIS	1.61688	0.0187726	0.0115933
GOBP_GLUTATHIONE_METABOLIC_PROCESS	1.61705	0.0248274	0.0153325
GOBP_NEURON_MATURATION	1.61827	0.0208658	0.0128859
GOBP_VASODILATION	1.61843	0.0244416	0.0150942
GOBP_RESPONSE_TO_TOXIC_SUBSTANCE	1.6188	0.00210118	0.00129761
GOBP_REGULATION_OF_CELLULAR_KETONE_METABOLIC_PROCESS	1.6202	0.00747037	0.00461342
GOBP_TEMPERATURE_HOMEOSTASIS	1.6205	0.00365712	0.0022585
GOBP_RESPONSE_TO_INTERLEUKIN_1	1.62106	0.00346208	0.00213805
GOBP_REGULATION_OF_DENDRITIC_CELL_CHEMOTAXIS	1.62191	0.0308364	0.0190434
GOBP_POSITIVE_REGULATION_OF_CARDIAC_MUSCLE_CELL_PROLIFERATION	1.62204	0.0516795	0.0319153
GOBP_ACTIN_FILAMENT_REORGANIZATION	1.62214	0.0308364	0.0190434
GOBP_REGULATION_OF_FATTY_ACID_METABOLIC_PROCESS	1.62346	0.0075337	0.00465254
GOBP_REGULATION_OF_PEPTIDASE_ACTIVITY	1.62352	9.09e-05	5.61e-05
GOBP_REGULATION_OF_ANATOMICAL_STRUCTURE_SIZE	1.62368	5.82e-05	3.59e-05
GOBP_POSITIVE_REGULATION_OF_SMALL_GTPASE_MEDIATED_SIGNAL_TRANSDUCTION	1.62442	0.0136048	0.0084018
GOBP_LONG_TERM_SYNAPTIC_POTENTIATION	1.62513	0.00766877	0.00473595
GOBP_POSITIVE_REGULATION_OF_SECRETION	1.62537	0.000934067	0.000576845
GOBP_DEFENSE_RESPONSE_TO_FUNGUS	1.62626	0.0164291	0.010146
GOBP_CELL_RECOGNITION	1.62689	0.00195954	0.00121014
GOBP_REGULATION_OF_ACTIN_FILAMENT_LENGTH	1.62695	0.0041007	0.00253244
GOBP_NEGATIVE_REGULATION_OF_HYDROLASE_ACTIVITY	1.62754	0.00021035	0.000129904
GOBP_MESENCHYME_MORPHOGENESIS	1.62763	0.0229219	0.0141557
GOBP_TRACHEA_DEVELOPMENT	1.62944	0.0356291	0.0220032
GOBP_LIPID_MODIFICATION	1.63037	0.00133931	0.000827105
GOBP_POSITIVE_REGULATION_OF_SYNAPTIC_TRANSMISSION	1.63154	0.00250776	0.0015487
GOBP_REGULATION_OF_DEFENSE_RESPONSE_TO_BACTERIUM	1.63173	0.0365177	0.022552
GOBP_REGULATION_OF_CELL_SHAPE	1.63205	0.00451166	0.00278623
GOBP_NEUTRAL_LIPID_CATABOLIC_PROCESS	1.63212	0.036295	0.0224145
GOBP_REGULATION_OF_CYSTEINE_TYPE_ENDOPEPTIDASE_ACTIVITY	1.63277	0.00104609	0.000646029
GOBP_REGULATION_OF_NEUTROPHIL_ACTIVATION	1.633	0.0248274	0.0153325
GOBP_KIDNEY_EPITHELIUM_DEVELOPMENT	1.63354	0.00462852	0.0028584
GOBP_REGULATION_OF_SUPRAMOLECULAR_FIBER_ORGANIZATION	1.63402	0.000144292	8.91e-05
GOBP_INTERLEUKIN_5_PRODUCTION	1.63478	0.0362687	0.0223982
GOBP_REGULATION_OF_CILIUM_MOVEMENT	1.63479	0.0140674	0.0086875
GOBP_MAINTENANCE_OF_BLOOD_BRAIN_BARRIER	1.63503	0.0286044	0.017665
GOBP_CELLULAR_OXIDANT_DETOXIFICATION	1.63564	0.0089753	0.00554281
GOBP_POSITIVE_REGULATION_OF_PROTEIN_KINASE_ACTIVITY	1.63654	0.000103216	6.37e-05
GOBP_RESPONSE_TO_MONOSACCHARIDE	1.63732	0.00196606	0.00121416
GOBP_ENDOCRINE_PROCESS	1.6384	0.0131136	0.00809844
GOBP_REGULATION_OF_OPSONIZATION	1.6385	0.0140574	0.00868131
GOBP_NEGATIVE_REGULATION_OF_WOUND_HEALING	1.63883	0.0136482	0.00842862
GOBP_NEPHRIC_DUCT_MORPHOGENESIS	1.63948	0.0203551	0.0125706
GOBP_ASTROCYTE_ACTIVATION	1.63965	0.0384546	0.0237482
GOBP_TISSUE_REMODELING	1.64093	0.0030446	0.00188023
GOBP_ACUTE_INFLAMMATORY_RESPONSE	1.6416	0.00513884	0.00317355
GOBP_STRESS_ACTIVATED_PROTEIN_KINASE_SIGNALING_CASCADE	1.64176	0.000621482	0.000383804
GOBP_POSITIVE_REGULATION_OF_JUN_KINASE_ACTIVITY	1.64256	0.0256582	0.0158456
GOBP_NITRIC_OXIDE_SYNTHASE_BIOSYNTHETIC_PROCESS	1.6426	0.0340361	0.0210195
GOBP_REGULATION_OF_TUBE_SIZE	1.64298	0.00356582	0.00220212
GOBP_HOMEOSTASIS_OF_NUMBER_OF_CELLS	1.64318	0.000422758	0.000261079
GOBP_TYROSINE_PHOSPHORYLATION_OF_STAT_PROTEIN	1.64342	0.00867845	0.00535949
GOBP_NEGATIVE_REGULATION_OF_ION_TRANSMEMBRANE_TRANSPORTER_ACTIVITY	1.64436	0.0105569	0.00651954
GOBP_CELL_MATRIX_ADHESION	1.64472	0.000958664	0.000592035
GOBP_REGULATION_OF_OXIDOREDUCTASE_ACTIVITY	1.64474	0.00669173	0.00413256
GOBP_PLATELET_ACTIVATION	1.64487	0.00387648	0.00239397
GOBP_REGULATION_OF_DEPHOSPHORYLATION	1.64495	0.00595698	0.00367881
GOBP_POSITIVE_REGULATION_OF_ENDOTHELIAL_CELL_MIGRATION	1.6454	0.00590747	0.00364823
GOBP_CELLULAR_RESPONSE_TO_PEPTIDE	1.64626	0.000141957	8.77e-05
GOBP_CELLULAR_RESPONSE_TO_XENOBIOTIC_STIMULUS	1.64692	0.00180403	0.0011141
GOBP_PHOSPHATIDYLGLYCEROL_METABOLIC_PROCESS	1.64745	0.0340361	0.0210195
GOBP_NEGATIVE_REGULATION_OF_CELL_KILLING	1.64748	0.0328301	0.0202747
GOBP_ACTIN_FILAMENT_POLYMERIZATION	1.6479	0.00362355	0.00223777
GOBP_REGULATION_OF_CHEMOKINE_MEDIATED_SIGNALING_PATHWAY	1.64915	0.0119415	0.00737465
GOBP_GLOMERULUS_DEVELOPMENT	1.64967	0.0109001	0.0067315
GOBP_NATURAL_KILLER_CELL_MEDIATED_IMMUNITY	1.65073	0.0115612	0.00713979
GOBP_POSITIVE_REGULATION_OF_FAT_CELL_DIFFERENTIATION	1.6526	0.0103173	0.00637158
GOBP_POSITIVE_REGULATION_OF_BIOMINERALIZATION	1.65271	0.0176522	0.0109013
GOBP_T_CELL_LINEAGE_COMMITMENT	1.65288	0.0323013	0.019948
GOBP_RESPONSE_TO_PURINE_CONTAINING_COMPOUND	1.65318	0.00396242	0.00244704
GOBP_REGULATION_OF_JNK_CASCADE	1.65415	0.00217065	0.00134052
GOBP_POSITIVE_REGULATION_OF_ION_TRANSPORT	1.65427	0.000538865	0.000332783
GOBP_NEGATIVE_REGULATION_OF_LIPID_METABOLIC_PROCESS	1.65579	0.00711637	0.0043948
GOBP_RHO_PROTEIN_SIGNAL_TRANSDUCTION	1.65588	0.00350206	0.00216274
GOBP_MINERALOCORTICOID_METABOLIC_PROCESS	1.6561	0.0194897	0.0120361
GOBP_POSITIVE_REGULATION_OF_CALCIUM_MEDIATED_SIGNALING	1.65662	0.0269586	0.0166486
GOBP_REGULATION_OF_CARDIAC_MUSCLE_CONTRACTION_BY_REGULATION_OF_THE_RELEASE_OF_SEQUESTERED_CALCIUM_ION	1.65699	0.0309946	0.0191411
GOBP_NITRIC_OXIDE_MEDIATED_SIGNAL_TRANSDUCTION	1.65722	0.0197889	0.0122209
GOBP_ENDOCARDIAL_CUSHION_DEVELOPMENT	1.6574	0.016946	0.0104652
GOBP_REGULATION_OF_CALCIUM_ION_TRANSMEMBRANE_TRANSPORT	1.65745	0.00195954	0.00121014
GOBP_REGULATION_OF_ACTIN_FILAMENT_BUNDLE_ASSEMBLY	1.65787	0.00635866	0.00392687
GOBP_REGULATION_OF_PHOSPHATIDYLCHOLINE_METABOLIC_PROCESS	1.65809	0.0105569	0.00651954
GOBP_RESPONSE_TO_TRANSFORMING_GROWTH_FACTOR_BETA	1.65887	0.000283513	0.000175087
GOBP_B_CELL_ACTIVATION	1.65922	0.000125459	7.75e-05
GOBP_AMEBOIDAL_TYPE_CELL_MIGRATION	1.65924	9.75e-06	6.02e-06
GOBP_RESPIRATORY_SYSTEM_DEVELOPMENT	1.65965	0.00122294	0.000755239
GOBP_REGULATION_OF_NITRIC_OXIDE_SYNTHASE_ACTIVITY	1.66035	0.0229281	0.0141595
GOBP_ENSHEATHMENT_OF_NEURONS	1.6606	0.00344124	0.00212518
GOBP_RECEPTOR_SIGNALING_PATHWAY_VIA_STAT	1.66079	0.00134453	0.000830332
GOBP_POSITIVE_REGULATION_OF_CALCIUM_ION_TRANSPORT	1.66109	0.00461897	0.00285251
GOBP_RESPONSE_TO_CARBOHYDRATE	1.66133	0.000498988	0.000308156
GOBP_REGULATION_OF_GLUCOSE_TRANSMEMBRANE_TRANSPORT	1.66191	0.0103432	0.00638758
GOBP_WATER_HOMEOSTASIS	1.66192	0.00885008	0.00546548
GOBP_POSITIVE_REGULATION_OF_MIRNA_TRANSCRIPTION	1.66225	0.0221657	0.0136887
GOBP_NEUROTRANSMITTER_CATABOLIC_PROCESS	1.6631	0.0199239	0.0123043
GOBP_REGULATION_OF_LIPID_BIOSYNTHETIC_PROCESS	1.66324	0.00180567	0.00111512
GOBP_POSITIVE_REGULATION_OF_TRIGLYCERIDE_LIPASE_ACTIVITY	1.66418	0.0190783	0.011782
GOBP_ETHANOL_METABOLIC_PROCESS	1.66422	0.0295197	0.0182303
GOBP_SMOOTH_MUSCLE_CELL_DIFFERENTIATION	1.66446	0.00985618	0.00608681
GOBP_RESPONSE_TO_CAMP	1.66771	0.00462852	0.0028584
GOBP_NEUTRAL_LIPID_BIOSYNTHETIC_PROCESS	1.66801	0.0160247	0.00989629
GOBP_HEART_PROCESS	1.66804	0.000422185	0.000260726
GOBP_NEGATIVE_REGULATION_OF_FATTY_ACID_OXIDATION	1.66822	0.0184233	0.0113775
GOBP_REGULATION_OF_CATION_TRANSMEMBRANE_TRANSPORT	1.66867	8.79e-05	5.43e-05
GOBP_REGULATION_OF_BLOOD_CIRCULATION	1.66884	0.000175333	0.000108279
GOBP_MEMBRANE_DEPOLARIZATION	1.66897	0.00833552	0.00514771
GOBP_REGULATION_OF_EXOCYTOSIS	1.66908	0.000692075	0.0004274
GOBP_REGULATION_OF_RAS_PROTEIN_SIGNAL_TRANSDUCTION	1.66915	0.00120756	0.000745746
GOBP_STRESS_FIBER_ASSEMBLY	1.67011	0.00352468	0.00217671
GOBP_POSITIVE_REGULATION_OF_ANTIGEN_RECEPTOR_MEDIATED_SIGNALING_PATHWAY	1.6711	0.0236666	0.0146156
GOBP_STEROL_METABOLIC_PROCESS	1.6714	0.00265459	0.00163938
GOBP_NEGATIVE_REGULATION_OF_EPITHELIAL_CELL_MIGRATION	1.67161	0.0033932	0.00209552
GOBP_SPROUTING_ANGIOGENESIS	1.6719	0.00126807	0.000783111
GOBP_PROSTANOID_METABOLIC_PROCESS	1.672	0.0147868	0.0091318
GOBP_NEUROINFLAMMATORY_RESPONSE	1.67217	0.0209588	0.0129434
GOBP_SEQUESTERING_OF_CALCIUM_ION	1.67296	0.00346208	0.00213805
GOBP_NEGATIVE_REGULATION_OF_SMALL_GTPASE_MEDIATED_SIGNAL_TRANSDUCTION	1.67494	0.0132929	0.00820921
GOBP_RELEASE_OF_SEQUESTERED_CALCIUM_ION_INTO_CYTOSOL_BY_ENDOPLASMIC_RETICULUM	1.6753	0.00935191	0.00577539
GOBP_CELLULAR_RESPONSE_TO_AMYLOID_BETA	1.67543	0.0144536	0.008926
GOBP_POSITIVE_REGULATION_OF_PROTEIN_SECRETION	1.67575	0.00320708	0.00198058
GOBP_ALCOHOL_METABOLIC_PROCESS	1.67622	4.66e-05	2.88e-05
GOBP_POSITIVE_REGULATION_OF_LIPID_TRANSPORT	1.67635	0.00712435	0.00439973
GOBP_CELL_CELL_ADHESION_VIA_PLASMA_MEMBRANE_ADHESION_MOLECULES	1.67639	0.000344877	0.000212983
GOBP_TRANSFORMING_GROWTH_FACTOR_BETA_RECEPTOR_SIGNALING_PATHWAY	1.67692	0.000692075	0.0004274
GOBP_EPITHELIAL_TUBE_BRANCHING_INVOLVED_IN_LUNG_MORPHOGENESIS	1.67819	0.0236826	0.0146255
GOBP_REGULATION_OF_PH	1.67932	0.00538539	0.00332582
GOBP_SMALL_GTPASE_MEDIATED_SIGNAL_TRANSDUCTION	1.67962	5.56e-06	3.43e-06
GOBP_UNSATURATED_FATTY_ACID_METABOLIC_PROCESS	1.67974	0.00211242	0.00130455
GOBP_CARDIAC_SEPTUM_MORPHOGENESIS	1.68005	0.00731317	0.00451634
GOBP_POSITIVE_REGULATION_OF_CELL_MATRIX_ADHESION	1.681	0.017312	0.0106913
GOBP_POSITIVE_REGULATION_OF_DNA_BINDING_TRANSCRIPTION_FACTOR_ACTIVITY	1.68135	0.000115385	7.13e-05
GOBP_NEGATIVE_REGULATION_OF_LEUKOCYTE_APOPTOTIC_PROCESS	1.68161	0.0133294	0.00823173
GOBP_REGULATION_OF_CARDIAC_MUSCLE_CELL_PROLIFERATION	1.68166	0.0133294	0.00823173
GOBP_PHOSPHOLIPID_TRANSPORT	1.68332	0.00669173	0.00413256
GOBP_ENDOTHELIAL_CELL_APOPTOTIC_PROCESS	1.68365	0.0070209	0.00433584
GOBP_DETECTION_OF_MOLECULE_OF_BACTERIAL_ORIGIN	1.68454	0.0128798	0.00795409
GOBP_MICROTUBULE_BUNDLE_FORMATION	1.68493	0.0041007	0.00253244
GOBP_FAT_CELL_DIFFERENTIATION	1.68516	0.000399023	0.000246422
GOBP_CELLULAR_LIPID_CATABOLIC_PROCESS	1.68538	0.00041777	0.000257999
GOBP_BONE_CELL_DEVELOPMENT	1.68644	0.0254505	0.0157173
GOBP_ACTIN_FILAMENT_BUNDLE_ORGANIZATION	1.68741	0.00125817	0.000776999
GOBP_NEGATIVE_REGULATION_OF_B_CELL_MEDIATED_IMMUNITY	1.68784	0.0193825	0.0119699
GOBP_BIOLOGICAL_PROCESS_INVOLVED_IN_SYMBIOTIC_INTERACTION	1.68868	0.000214414	0.000132414
GOBP_RESPONSE_TO_ETHANOL	1.68904	0.0033932	0.00209552
GOBP_REGULATION_OF_DNA_BINDING_TRANSCRIPTION_FACTOR_ACTIVITY	1.68948	7.7e-06	4.76e-06
GOBP_STEROID_METABOLIC_PROCESS	1.68978	6.75e-05	4.17e-05
GOBP_G_PROTEIN_COUPLED_RECEPTOR_SIGNALING_PATHWAY_INVOLVED_IN_HEART_PROCESS	1.69085	0.0130119	0.00803568
GOBP_HEART_FORMATION	1.69087	0.0268023	0.0165521
GOBP_EXPORT_ACROSS_PLASMA_MEMBRANE	1.6911	0.00462582	0.00285673
GOBP_CD8_POSITIVE_ALPHA_BETA_T_CELL_DIFFERENTIATION	1.69193	0.0129606	0.00800396
GOBP_REGULATION_OF_LIPID_TRANSPORT	1.6929	0.00219666	0.00135658
GOBP_POSITIVE_REGULATION_OF_TRANSMEMBRANE_TRANSPORT	1.69349	0.000607676	0.000375278
GOBP_MEMBRANE_REPOLARIZATION	1.69356	0.0112256	0.0069325
GOBP_REGULATION_OF_ANTIMICROBIAL_HUMORAL_RESPONSE	1.69417	0.00482374	0.00297896
GOBP_NEGATIVE_REGULATION_OF_TRANSPORT	1.69438	4.16e-06	2.57e-06
GOBP_CELLULAR_RESPONSE_TO_LOW_DENSITY_LIPOPROTEIN_PARTICLE_STIMULUS	1.69439	0.0209588	0.0129434
GOBP_ACTIN_POLYMERIZATION_OR_DEPOLYMERIZATION	1.69501	0.000929163	0.000573817
GOBP_POSITIVE_REGULATION_OF_MAST_CELL_ACTIVATION	1.69509	0.0254324	0.0157061
GOBP_GLYCEROLIPID_BIOSYNTHETIC_PROCESS	1.6955	0.000213135	0.000131624
GOBP_LONG_CHAIN_FATTY_ACID_METABOLIC_PROCESS	1.69616	0.00195954	0.00121014
GOBP_REGULATION_OF_ACTIN_FILAMENT_BASED_PROCESS	1.69792	3.65e-05	2.26e-05
GOBP_B_CELL_DIFFERENTIATION	1.69822	0.00144049	0.00088959
GOBP_REGULATION_OF_COAGULATION	1.70001	0.00821977	0.00507623
GOBP_REGULATION_OF_MIRNA_TRANSCRIPTION	1.70004	0.0154077	0.0095152
GOBP_LEUKOCYTE_HOMEOSTASIS	1.70029	0.00248574	0.0015351
GOBP_CALCIUM_INDEPENDENT_CELL_CELL_ADHESION_VIA_PLASMA_MEMBRANE_CELL_ADHESION_MOLECULES	1.70042	0.0251346	0.0155222
GOBP_G_PROTEIN_COUPLED_RECEPTOR_SIGNALING_PATHWAY_COUPLED_TO_CYCLIC_NUCLEOTIDE_SECOND_MESSENGER	1.70054	0.00562325	0.00347271
GOBP_SPERM_MOTILITY	1.70171	0.00213103	0.00131605
GOBP_EXOCYTOSIS	1.70176	3.98e-05	2.46e-05
GOBP_REGULATION_OF_NATURAL_KILLER_CELL_MEDIATED_IMMUNITY	1.70227	0.0106505	0.00657735
GOBP_ENDOCARDIAL_CUSHION_FORMATION	1.70252	0.0182807	0.0112895
GOBP_REGULATION_OF_ENDOCYTOSIS	1.70462	0.000295259	0.000182341
GOBP_WOUND_HEALING	1.7047	3.64e-06	2.25e-06
GOBP_ACTIN_CYTOSKELETON_REORGANIZATION	1.70473	0.00200639	0.00123907
GOBP_CELL_ADHESION_MOLECULE_PRODUCTION	1.70478	0.0106494	0.00657666
GOBP_VASCULAR_ENDOTHELIAL_GROWTH_FACTOR_PRODUCTION	1.70497	0.0110397	0.00681773
GOBP_CELLULAR_MONOVALENT_INORGANIC_CATION_HOMEOSTASIS	1.70528	0.00201637	0.00124523
GOBP_REGULATION_OF_ENDOTHELIAL_CELL_DIFFERENTIATION	1.70554	0.0105158	0.00649415
GOBP_NEGATIVE_REGULATION_OF_PROTEIN_LOCALIZATION_TO_NUCLEUS	1.70666	0.0140574	0.00868131
GOBP_POSITIVE_REGULATION_OF_RESPONSE_TO_BIOTIC_STIMULUS	1.70694	0.00041777	0.000257999
GOBP_DIGESTION	1.70754	0.00248726	0.00153604
GOBP_REGULATION_OF_CALCIUM_ION_TRANSPORT_INTO_CYTOSOL	1.70761	0.00288911	0.00178421
GOBP_ORGANOPHOSPHATE_ESTER_TRANSPORT	1.70763	0.00119926	0.000740617
GOBP_LUNG_MORPHOGENESIS	1.70849	0.0165854	0.0102425
GOBP_RESPONSE_TO_STEROID_HORMONE	1.70895	2.73e-05	1.69e-05
GOBP_REGULATION_OF_EPITHELIAL_CELL_APOPTOTIC_PROCESS	1.70927	0.0041007	0.00253244
GOBP_POSITIVE_REGULATION_OF_OSSIFICATION	1.71066	0.00969154	0.00598513
GOBP_NEGATIVE_REGULATION_OF_HEMOPOIESIS	1.71089	0.0018456	0.00113977
GOBP_REGULATION_OF_LEUKOCYTE_TETHERING_OR_ROLLING	1.71121	0.0137575	0.0084961
GOBP_PROTEIN_KINASE_B_SIGNALING	1.71143	0.000252933	0.000156202
GOBP_FATTY_ACID_TRANSPORT	1.71157	0.00279179	0.0017241
GOBP_SYNAPSE_PRUNING	1.71198	0.00991506	0.00612317
GOBP_LEUKOCYTE_TETHERING_OR_ROLLING	1.71205	0.0138818	0.00857286
GOBP_CHOLESTEROL_STORAGE	1.71276	0.021905	0.0135277
GOBP_REGULATION_OF_CELL_COMMUNICATION_BY_ELECTRICAL_COUPLING	1.71353	0.0137575	0.0084961
GOBP_JNK_CASCADE	1.71443	0.00036085	0.000222848
GOBP_SODIUM_ION_HOMEOSTASIS	1.71455	0.00756316	0.00467073
GOBP_POSITIVE_REGULATION_OF_REACTIVE_OXYGEN_SPECIES_METABOLIC_PROCESS	1.71566	0.00439985	0.00271718
GOBP_REGULATION_OF_LIPOPROTEIN_PARTICLE_CLEARANCE	1.71589	0.012948	0.0079962
GOBP_POSITIVE_REGULATION_OF_BONE_MINERALIZATION	1.7165	0.0158702	0.00980087
GOBP_POSITIVE_REGULATION_OF_MACROPHAGE_MIGRATION	1.71752	0.00902472	0.00557333
GOBP_POSITIVE_REGULATION_OF_KINASE_ACTIVITY	1.71793	9.16e-07	5.66e-07
GOBP_LEUKOTRIENE_METABOLIC_PROCESS	1.718	0.0127255	0.00785881
GOBP_REGULATION_OF_LEUKOCYTE_ADHESION_TO_VASCULAR_ENDOTHELIAL_CELL	1.71828	0.0158702	0.00980087
GOBP_VASCULOGENESIS	1.71941	0.00325818	0.00201213
GOBP_REGULATION_OF_DENDRITIC_CELL_ANTIGEN_PROCESSING_AND_PRESENTATION	1.71974	0.0089753	0.00554281
GOBP_REGULATION_OF_PHOSPHATASE_ACTIVITY	1.72136	0.00322297	0.00199039
GOBP_RESPONSE_TO_PROSTAGLANDIN	1.72208	0.013913	0.00859214
GOBP_POSITIVE_REGULATION_OF_DEPHOSPHORYLATION	1.7229	0.0101866	0.00629086
GOBP_ENDOTHELIAL_CELL_PROLIFERATION	1.72294	0.000464475	0.000286843
GOBP_NEGATIVE_REGULATION_OF_ANTIGEN_RECEPTOR_MEDIATED_SIGNALING_PATHWAY	1.72373	0.012068	0.00745276
GOBP_CELL_SUBSTRATE_ADHESION	1.72382	1.47e-05	9.07e-06
GOBP_POSITIVE_REGULATION_OF_LIPID_KINASE_ACTIVITY	1.72487	0.0221586	0.0136843
GOBP_NEGATIVE_REGULATION_OF_SMOOTH_MUSCLE_CELL_PROLIFERATION	1.72494	0.00519318	0.00320711
GOBP_AMINOGLYCAN_CATABOLIC_PROCESS	1.72539	0.013422	0.00828893
GOBP_NEGATIVE_REGULATION_OF_BLOOD_CIRCULATION	1.7254	0.0147815	0.00912849
GOBP_LEUKOTRIENE_BIOSYNTHETIC_PROCESS	1.72543	0.0196041	0.0121068
GOBP_ANTIMICROBIAL_HUMORAL_RESPONSE	1.72569	0.00242043	0.00149477
GOBP_POSITIVE_REGULATION_OF_MAP_KINASE_ACTIVITY	1.72615	0.00271109	0.00167427
GOBP_NEGATIVE_REGULATION_OF_HUMORAL_IMMUNE_RESPONSE_MEDIATED_BY_CIRCULATING_IMMUNOGLOBULIN	1.72638	0.00784716	0.00484611
GOBP_ADENYLATE_CYCLASE_ACTIVATING_G_PROTEIN_COUPLED_RECEPTOR_SIGNALING_PATHWAY	1.72641	0.00168032	0.0010377
GOBP_REGULATION_OF_SYSTEMIC_ARTERIAL_BLOOD_PRESSURE	1.72645	0.00254523	0.00157184
GOBP_POSITIVE_REGULATION_OF_LIPID_LOCALIZATION	1.7268	0.00119926	0.000740617
GOBP_GRANULOCYTE_DIFFERENTIATION	1.72716	0.00497528	0.00307255
GOBP_CORONARY_VASCULATURE_DEVELOPMENT	1.728	0.00774443	0.00478267
GOBP_POSITIVE_REGULATION_OF_ENDOTHELIAL_CELL_DIFFERENTIATION	1.7303	0.00752505	0.00464719
GOBP_REGULATION_OF_PHOSPHATIDYLINOSITOL_3_KINASE_SIGNALING	1.73131	0.00165837	0.00102415
GOBP_POSITIVE_REGULATION_OF_RESPONSE_TO_WOUNDING	1.73153	0.00258862	0.00159863
GOBP_ANGIOTENSIN_ACTIVATED_SIGNALING_PATHWAY	1.73171	0.0069148	0.00427032
GOBP_REGULATION_OF_TRANSPORTER_ACTIVITY	1.73186	4.61e-05	2.85e-05
GOBP_POSITIVE_REGULATION_OF_EPITHELIAL_CELL_MIGRATION	1.73322	0.000348924	0.000215482
GOBP_REGULATION_OF_RHO_PROTEIN_SIGNAL_TRANSDUCTION	1.73347	0.00350945	0.00216731
GOBP_REGULATION_OF_MAP_KINASE_ACTIVITY	1.73501	0.000279872	0.000172838
GOBP_CALCIUM_ION_TRANSMEMBRANE_TRANSPORT	1.73502	2.79e-05	1.72e-05
GOBP_NEGATIVE_REGULATION_OF_INTERLEUKIN_12_PRODUCTION	1.73658	0.0064702	0.00399575
GOBP_CYTOLYSIS	1.73695	0.012702	0.0078443
GOBP_FATTY_ACID_BIOSYNTHETIC_PROCESS	1.73744	0.000620091	0.000382945
GOBP_LONG_TERM_MEMORY	1.73779	0.0106374	0.00656927
GOBP_NEGATIVE_REGULATION_OF_OXIDOREDUCTASE_ACTIVITY	1.73942	0.0162262	0.0100207
GOBP_REGULATION_OF_ION_TRANSMEMBRANE_TRANSPORT	1.73973	4.07e-07	2.51e-07
GOBP_IMMUNOLOGICAL_SYNAPSE_FORMATION	1.74012	0.0031084	0.00191963
GOBP_MATURE_B_CELL_DIFFERENTIATION	1.74024	0.0136048	0.0084018
GOBP_FC_EPSILON_RECEPTOR_SIGNALING_PATHWAY	1.74098	0.0121134	0.00748079
GOBP_POSITIVE_REGULATION_OF_CELL_SUBSTRATE_ADHESION	1.74105	0.00141696	0.000875064
GOBP_REGULATION_OF_LIPID_LOCALIZATION	1.74107	0.000367176	0.000226755
GOBP_PHENOL_CONTAINING_COMPOUND_METABOLIC_PROCESS	1.74275	0.00189396	0.00116964
GOBP_POSITIVE_THYMIC_T_CELL_SELECTION	1.74294	0.00528535	0.00326404
GOBP_ONE_CARBON_COMPOUND_TRANSPORT	1.74324	0.00288911	0.00178421
GOBP_ENTRY_INTO_HOST	1.74401	0.000311129	0.000192142
GOBP_NEGATIVE_REGULATION_OF_TOLL_LIKE_RECEPTOR_SIGNALING_PATHWAY	1.7447	0.0110336	0.00681394
GOBP_BONE_RESORPTION	1.74544	0.00581803	0.003593
GOBP_REGULATION_OF_METAL_ION_TRANSPORT	1.74557	3.18e-06	1.96e-06
GOBP_REGULATION_OF_CELLULAR_EXTRAVASATION	1.74579	0.0109359	0.00675363
GOBP_MONOCARBOXYLIC_ACID_TRANSPORT	1.74608	0.00107744	0.000665387
GOBP_PROTEIN_CONTAINING_COMPLEX_REMODELING	1.74626	0.00863516	0.00533275
GOBP_REGULATED_EXOCYTOSIS	1.74641	9.79e-05	6.05e-05
GOBP_EPITHELIAL_FLUID_TRANSPORT	1.74668	0.00113763	0.000702559
GOBP_ARACHIDONIC_ACID_METABOLIC_PROCESS	1.74674	0.00731682	0.0045186
GOBP_LIPID_CATABOLIC_PROCESS	1.74687	8.92e-06	5.51e-06
GOBP_POSITIVE_REGULATION_OF_STRESS_ACTIVATED_PROTEIN_KINASE_SIGNALING_CASCADE	1.74903	0.000648121	0.000400256
GOBP_NEUTROPHIL_ACTIVATION_INVOLVED_IN_IMMUNE_RESPONSE	1.74912	0.00936301	0.00578224
GOBP_AMINOGLYCAN_METABOLIC_PROCESS	1.74953	0.00143141	0.000883988
GOBP_TISSUE_MIGRATION	1.75004	4e-06	2.47e-06
GOBP_ARACHIDONIC_ACID_SECRETION	1.75022	0.00982456	0.00606728
GOBP_POSITIVE_REGULATION_OF_INTERFERON_GAMMA_PRODUCTION	1.75063	0.00191628	0.00118342
GOBP_RESPONSE_TO_FUNGUS	1.75104	0.00729497	0.0045051
GOBP_OPSONIZATION	1.75136	0.00721709	0.004457
GOBP_MONOCARBOXYLIC_ACID_BIOSYNTHETIC_PROCESS	1.75177	0.000152216	9.4e-05
GOBP_COMPLEMENT_ACTIVATION_LECTIN_PATHWAY	1.75182	0.00365477	0.00225705
GOBP_CD4_POSITIVE_OR_CD8_POSITIVE_ALPHA_BETA_T_CELL_LINEAGE_COMMITMENT	1.75183	0.00982456	0.00606728
GOBP_DETECTION_OF_BIOTIC_STIMULUS	1.75212	0.0176522	0.0109013
GOBP_ACTIN_FILAMENT_ORGANIZATION	1.75221	1.22e-06	7.56e-07
GOBP_NEGATIVE_REGULATION_OF_LEUKOCYTE_DEGRANULATION	1.75272	0.0044085	0.00272253
GOBP_MONOCYTE_CHEMOTAXIS	1.75494	0.00298905	0.00184593
GOBP_POSITIVE_REGULATION_OF_WOUND_HEALING	1.75505	0.0047674	0.00294417
GOBP_REGULATION_OF_INNATE_IMMUNE_RESPONSE	1.75549	0.000138028	8.52e-05
GOBP_T_CELL_DIFFERENTIATION_IN_THYMUS	1.7556	0.00204834	0.00126498
GOBP_REGULATION_OF_ACTIN_FILAMENT_ORGANIZATION	1.75592	3.63e-05	2.24e-05
GOBP_COMPLEMENT_RECEPTOR_MEDIATED_SIGNALING_PATHWAY	1.75662	0.00237348	0.00146577
GOBP_VASCULAR_PROCESS_IN_CIRCULATORY_SYSTEM	1.75707	4.03e-05	2.49e-05
GOBP_SEROTONIN_TRANSPORT	1.75816	0.00443514	0.00273897
GOBP_NEGATIVE_REGULATION_OF_MYELOID_LEUKOCYTE_MEDIATED_IMMUNITY	1.75914	0.00320708	0.00198058
GOBP_SUPEROXIDE_METABOLIC_PROCESS	1.7595	0.00189396	0.00116964
GOBP_RESPONSE_TO_ALCOHOL	1.76031	3.12e-05	1.93e-05
GOBP_POSITIVE_REGULATION_OF_PATTERN_RECOGNITION_RECEPTOR_SIGNALING_PATHWAY	1.76033	0.00696936	0.00430401
GOBP_B_CELL_RECEPTOR_SIGNALING_PATHWAY	1.76196	0.00074213	0.000458312
GOBP_CATECHOL_CONTAINING_COMPOUND_METABOLIC_PROCESS	1.76229	0.00462892	0.00285865
GOBP_ENDOTHELIUM_DEVELOPMENT	1.76313	0.000526772	0.000325315
GOBP_REGULATION_OF_SMALL_GTPASE_MEDIATED_SIGNAL_TRANSDUCTION	1.76352	1.88e-05	1.16e-05
GOBP_HYDROGEN_PEROXIDE_METABOLIC_PROCESS	1.76413	0.00598552	0.00369643
GOBP_AXONEMAL_DYNEIN_COMPLEX_ASSEMBLY	1.76418	0.00441537	0.00272677
GOBP_NEGATIVE_REGULATION_OF_LIPID_CATABOLIC_PROCESS	1.76566	0.00887608	0.00548154
GOBP_POSITIVE_REGULATION_OF_ENDOCYTOSIS	1.76674	0.00114661	0.000708102
GOBP_POSITIVE_REGULATION_OF_NEUROINFLAMMATORY_RESPONSE	1.76694	0.00590747	0.00364823
GOBP_DETECTION_OF_OTHER_ORGANISM	1.76728	0.0108684	0.00671191
GOBP_MYELOID_CELL_DEVELOPMENT	1.76866	0.00289293	0.00178656
GOBP_REGULATION_OF_VASCULATURE_DEVELOPMENT	1.76895	4.03e-06	2.49e-06
GOBP_LEUKOCYTE_APOPTOTIC_PROCESS	1.76895	0.000722383	0.000446117
GOBP_ORGANIC_HYDROXY_COMPOUND_TRANSPORT	1.76897	4.08e-05	2.52e-05
GOBP_INFLAMMATORY_RESPONSE_TO_ANTIGENIC_STIMULUS	1.76918	0.0013658	0.000843469
GOBP_XENOBIOTIC_METABOLIC_PROCESS	1.77201	0.000702316	0.000433724
GOBP_POSITIVE_REGULATION_OF_INTERLEUKIN_8_PRODUCTION	1.77215	0.00538666	0.0033266
GOBP_REGULATION_OF_GLIAL_CELL_MIGRATION	1.77223	0.00145451	0.000898254
GOBP_POSITIVE_REGULATION_OF_NF_KAPPAB_TRANSCRIPTION_FACTOR_ACTIVITY	1.77238	0.000529611	0.000327068
GOBP_REGULATION_OF_SYSTEMIC_ARTERIAL_BLOOD_PRESSURE_BY_HORMONE	1.77317	0.00654246	0.00404038
GOBP_REGULATION_OF_BIOLOGICAL_PROCESS_INVOLVED_IN_SYMBIOTIC_INTERACTION	1.77353	0.00378663	0.00233848
GOBP_PEPTIDYL_TYROSINE_MODIFICATION	1.77429	2.1e-06	1.3e-06
GOBP_POSITIVE_REGULATION_OF_PHOSPHOLIPASE_ACTIVITY	1.77503	0.00360717	0.00222765
GOBP_PHOSPHOLIPID_CATABOLIC_PROCESS	1.77551	0.00403379	0.00249112
GOBP_PROTEIN_LOCALIZATION_TO_CELL_SURFACE	1.77629	0.00211242	0.00130455
GOBP_LIPID_LOCALIZATION	1.77663	4.27e-07	2.63e-07
GOBP_REGULATION_OF_RESPONSE_TO_WOUNDING	1.77696	9.03e-05	5.58e-05
GOBP_REGULATION_OF_MYELOID_CELL_DIFFERENTIATION	1.7771	0.000117853	7.28e-05
GOBP_DEFENSE_RESPONSE_TO_TUMOR_CELL	1.77735	0.0024201	0.00149456
GOBP_NEGATIVE_REGULATION_OF_LOCOMOTION	1.77895	1.21e-06	7.48e-07
GOBP_REGULATION_OF_WOUND_HEALING	1.77926	0.000338071	0.00020878
GOBP_PHOSPHATIDYLETHANOLAMINE_METABOLIC_PROCESS	1.77974	0.00669173	0.00413256
GOBP_NEGATIVE_REGULATION_OF_SYNAPTIC_TRANSMISSION	1.78036	0.00184844	0.00114153
GOBP_RELAXATION_OF_CARDIAC_MUSCLE	1.78079	0.00324322	0.00200289
GOBP_OLEFINIC_COMPOUND_METABOLIC_PROCESS	1.78108	0.000208621	0.000128837
GOBP_RELAXATION_OF_MUSCLE	1.78116	0.00581786	0.00359289
GOBP_CILIUM_ORGANIZATION	1.78124	1.96e-06	1.21e-06
GOBP_RESPONSE_TO_TUMOR_NECROSIS_FACTOR	1.78132	4.57e-05	2.83e-05
GOBP_PRIMARY_ALCOHOL_METABOLIC_PROCESS	1.78177	0.000253957	0.000156834
GOBP_CYTOSOLIC_CALCIUM_ION_TRANSPORT	1.78178	0.000147255	9.09e-05
GOBP_REGULATION_OF_TRIGLYCERIDE_METABOLIC_PROCESS	1.78227	0.00636259	0.0039293
GOBP_REGULATION_OF_VIRAL_ENTRY_INTO_HOST_CELL	1.78258	0.00636259	0.0039293
GOBP_RESPONSE_TO_CORTICOSTEROID	1.78283	0.000272987	0.000168586
GOBP_HYDROGEN_PEROXIDE_CATABOLIC_PROCESS	1.78317	0.0100945	0.00623401
GOBP_REGULATION_OF_MACROPHAGE_CHEMOTAXIS	1.7842	0.00643274	0.00397262
GOBP_MYELOID_CELL_DIFFERENTIATION	1.78443	7.19e-07	4.44e-07
GOBP_POSITIVE_REGULATION_OF_LEUKOCYTE_CHEMOTAXIS	1.78551	0.00148988	0.000920092
GOBP_RENAL_ABSORPTION	1.78685	0.00838477	0.00517812
GOBP_CELLULAR_RESPONSE_TO_OXIDISED_LOW_DENSITY_LIPOPROTEIN_PARTICLE_STIMULUS	1.78731	0.00168032	0.0010377
GOBP_POSITIVE_REGULATION_OF_MACROPHAGE_ACTIVATION	1.78739	0.00626389	0.00386835
GOBP_PRODUCTION_OF_MOLECULAR_MEDIATOR_OF_IMMUNE_RESPONSE	1.78805	5.68e-06	3.51e-06
GOBP_ORGAN_OR_TISSUE_SPECIFIC_IMMUNE_RESPONSE	1.78846	0.00843433	0.00520873
GOBP_REGULATION_OF_PEPTIDYL_TYROSINE_PHOSPHORYLATION	1.78913	9.87e-06	6.09e-06
GOBP_GLYCEROLIPID_CATABOLIC_PROCESS	1.78939	0.00139219	0.000859763
GOBP_PHOSPHATIDYLINOSITOL_3_KINASE_SIGNALING	1.78944	0.000140432	8.67e-05
GOBP_LEUKOCYTE_ADHESION_TO_VASCULAR_ENDOTHELIAL_CELL	1.7899	0.00315113	0.00194602
GOBP_NEGATIVE_REGULATION_OF_BLOOD_VESSEL_ENDOTHELIAL_CELL_MIGRATION	1.79008	0.00193841	0.00119709
GOBP_POSITIVE_REGULATION_OF_JNK_CASCADE	1.79023	0.00099196	0.000612598
GOBP_MONOVALENT_INORGANIC_CATION_HOMEOSTASIS	1.79037	0.000270582	0.000167101
GOBP_LONG_CHAIN_FATTY_ACID_TRANSPORT	1.79076	0.0018039	0.00111402
GOBP_NEGATIVE_REGULATION_OF_VASCULATURE_DEVELOPMENT	1.7915	0.000188846	0.000116624
GOBP_POSITIVE_REGULATION_OF_MACROPHAGE_DERIVED_FOAM_CELL_DIFFERENTIATION	1.79398	0.00245613	0.00151681
GOBP_RECEPTOR_MEDIATED_ENDOCYTOSIS	1.79431	1.05e-05	6.49e-06
GOBP_PRODUCTION_OF_MOLECULAR_MEDIATOR_INVOLVED_IN_INFLAMMATORY_RESPONSE	1.79451	0.000601605	0.000371529
GOBP_REGULATION_OF_MEMBRANE_INVAGINATION	1.79466	0.000824914	0.000509436
GOBP_DEFENSE_RESPONSE_TO_BACTERIUM	1.79544	1.04e-06	6.43e-07
GOBP_REGULATION_OF_LIPOPOLYSACCHARIDE_MEDIATED_SIGNALING_PATHWAY	1.79619	0.00236522	0.00146067
GOBP_REGULATION_OF_PHOSPHOLIPASE_ACTIVITY	1.79635	0.00155769	0.000961973
GOBP_POSITIVE_REGULATION_OF_PHOSPHATIDYLINOSITOL_3_KINASE_SIGNALING	1.79724	0.00103244	0.000637594
GOBP_POSITIVE_REGULATION_OF_SMOOTH_MUSCLE_CELL_PROLIFERATION	1.79885	0.000837844	0.000517421
GOBP_WATER_TRANSPORT	1.79979	0.00520716	0.00321575
GOBP_REGULATION_OF_SYSTEMIC_ARTERIAL_BLOOD_PRESSURE_MEDIATED_BY_A_CHEMICAL_SIGNAL	1.79984	0.00269295	0.00166307
GOBP_RENAL_SYSTEM_PROCESS_INVOLVED_IN_REGULATION_OF_SYSTEMIC_ARTERIAL_BLOOD_PRESSURE	1.80047	0.00221664	0.00136892
GOBP_TRANSCYTOSIS	1.80116	0.00346208	0.00213805
GOBP_NEGATIVE_REGULATION_OF_OSTEOCLAST_DIFFERENTIATION	1.80132	0.00754783	0.00466126
GOBP_MEMBRANE_RAFT_ORGANIZATION	1.80242	0.00512971	0.00316791
GOBP_REGULATION_OF_SYSTEMIC_ARTERIAL_BLOOD_PRESSURE_BY_CIRCULATORY_RENIN_ANGIOTENSIN	1.8027	0.00247758	0.00153006
GOBP_DETECTION_OF_EXTERNAL_BIOTIC_STIMULUS	1.80323	0.00210118	0.00129761
GOBP_TOLL_LIKE_RECEPTOR_4_SIGNALING_PATHWAY	1.80327	0.00376796	0.00232695
GOBP_POSITIVE_REGULATION_OF_LIPID_METABOLIC_PROCESS	1.8051	0.000135803	8.39e-05
GOBP_REGULATION_OF_HUMORAL_IMMUNE_RESPONSE_MEDIATED_BY_CIRCULATING_IMMUNOGLOBULIN	1.80546	0.00354392	0.00218859
GOBP_BLOOD_VESSEL_ENDOTHELIAL_CELL_PROLIFERATION_INVOLVED_IN_SPROUTING_ANGIOGENESIS	1.8055	0.00243716	0.0015051
GOBP_REGULATION_OF_LONG_TERM_SYNAPTIC_POTENTIATION	1.80768	0.00198272	0.00122445
GOBP_CALCIUM_ION_TRANSPORT_INTO_CYTOSOL	1.80804	0.000100399	6.2e-05
GOBP_AMINO_SUGAR_CATABOLIC_PROCESS	1.8088	0.000962572	0.000594449
GOBP_REGULATION_OF_MYELOID_LEUKOCYTE_DIFFERENTIATION	1.80922	0.000375305	0.000231774
GOBP_REGULATION_OF_CALCIUM_ION_TRANSPORT	1.80954	9.61e-06	5.94e-06
GOBP_FOAM_CELL_DIFFERENTIATION	1.80994	0.00348403	0.00215161
GOBP_REGULATION_OF_LEUKOCYTE_APOPTOTIC_PROCESS	1.80996	0.00041777	0.000257999
GOBP_ENDOTHELIAL_CELL_MIGRATION	1.81012	1.16e-05	7.18e-06
GOBP_NEUTROPHIL_MIGRATION	1.81017	0.000397613	0.000245551
GOBP_POSITIVE_REGULATION_OF_TRIGLYCERIDE_METABOLIC_PROCESS	1.81087	0.00636259	0.0039293
GOBP_REGULATION_OF_MACROPHAGE_DERIVED_FOAM_CELL_DIFFERENTIATION	1.81093	0.00637219	0.00393523
GOBP_NEGATIVE_REGULATION_OF_LONG_TERM_SYNAPTIC_POTENTIATION	1.81117	0.00090959	0.000561729
GOBP_POSITIVE_REGULATION_OF_PHOSPHATASE_ACTIVITY	1.81166	0.00481688	0.00297473
GOBP_POSITIVE_REGULATION_OF_HUMORAL_IMMUNE_RESPONSE	1.81184	0.00636259	0.0039293
GOBP_REGULATION_OF_LIPID_METABOLIC_PROCESS	1.81208	1.02e-06	6.3e-07
GOBP_GAS_TRANSPORT	1.81331	0.00302414	0.0018676
GOBP_REGULATION_OF_SYSTEMIC_ARTERIAL_BLOOD_PRESSURE_BY_RENIN_ANGIOTENSIN	1.81387	0.0041007	0.00253244
GOBP_DENDRITIC_CELL_ANTIGEN_PROCESSING_AND_PRESENTATION	1.81501	0.000789616	0.000487637
GOBP_REGULATION_OF_GTPASE_ACTIVITY	1.81668	2.44e-07	1.51e-07
GOBP_PROTEIN_LIPID_COMPLEX_SUBUNIT_ORGANIZATION	1.81724	0.00195954	0.00121014
GOBP_GLYCEROPHOSPHOLIPID_METABOLIC_PROCESS	1.81754	1.88e-06	1.16e-06
GOBP_NEUTROPHIL_CHEMOTAXIS	1.81991	0.00045999	0.000284073
GOBP_NEGATIVE_REGULATION_OF_ENDOTHELIAL_CELL_PROLIFERATION	1.82177	0.00119559	0.00073835
GOBP_ESTABLISHMENT_OF_ENDOTHELIAL_BARRIER	1.82191	0.00186068	0.00114909
GOBP_REGULATION_OF_LEUKOCYTE_CHEMOTAXIS	1.82231	0.000346039	0.000213701
GOBP_REGULATION_OF_CHEMOTAXIS	1.82291	2.21e-05	1.36e-05
GOBP_ADENYLATE_CYCLASE_MODULATING_G_PROTEIN_COUPLED_RECEPTOR_SIGNALING_PATHWAY	1.8245	1.38e-05	8.53e-06
GOBP_DIVALENT_INORGANIC_CATION_HOMEOSTASIS	1.82458	5.1e-09	3.15e-09
GOBP_INOSITOL_LIPID_MEDIATED_SIGNALING	1.82533	2.12e-05	1.31e-05
GOBP_ADENYLATE_CYCLASE_ACTIVATING_ADRENERGIC_RECEPTOR_SIGNALING_PATHWAY	1.82933	0.00285666	0.00176417
GOBP_I_KAPPAB_KINASE_NF_KAPPAB_SIGNALING	1.83037	1.64e-06	1.01e-06
GOBP_REGULATION_OF_BLOOD_PRESSURE	1.83145	2.15e-05	1.33e-05
GOBP_REGULATION_OF_COMPLEMENT_ACTIVATION	1.83265	0.00272634	0.00168369
GOBP_CALCIUM_ION_TRANSPORT	1.83371	6.18e-08	3.82e-08
GOBP_REGULATION_OF_CD4_POSITIVE_ALPHA_BETA_T_CELL_DIFFERENTIATION	1.8348	0.00378663	0.00233848
GOBP_NEGATIVE_REGULATION_OF_DEFENSE_RESPONSE	1.83488	1.39e-06	8.57e-07
GOBP_REGULATION_OF_P38MAPK_CASCADE	1.83538	0.00151139	0.000933376
GOBP_MUSCLE_CELL_PROLIFERATION	1.83559	5.56e-06	3.43e-06
GOBP_NEGATIVE_REGULATION_OF_EPITHELIAL_CELL_PROLIFERATION	1.83585	5.54e-05	3.42e-05
GOBP_NEUTRAL_LIPID_METABOLIC_PROCESS	1.83619	0.000149017	9.2e-05
GOBP_VACUOLAR_LOCALIZATION	1.83721	0.000433953	0.000267993
GOBP_NEGATIVE_REGULATION_OF_MAST_CELL_ACTIVATION	1.83787	0.000398055	0.000245824
GOBP_CELLULAR_EXTRAVASATION	1.83805	0.000550872	0.000340198
GOBP_SMOOTH_MUSCLE_CELL_PROLIFERATION	1.83846	2.44e-05	1.51e-05
GOBP_POSITIVE_REGULATION_OF_CD4_POSITIVE_ALPHA_BETA_T_CELL_ACTIVATION	1.84029	0.00223931	0.00138291
GOBP_PLASMA_LIPOPROTEIN_PARTICLE_CLEARANCE	1.8414	0.00113615	0.000701644
GOBP_REGULATION_OF_NIK_NF_KAPPAB_SIGNALING	1.84228	0.000113149	6.99e-05
GOBP_CYTOKINE_PRODUCTION_INVOLVED_IN_IMMUNE_RESPONSE	1.84259	0.000338485	0.000209035
GOBP_PHOSPHOLIPASE_C_ACTIVATING_G_PROTEIN_COUPLED_RECEPTOR_SIGNALING_PATHWAY	1.84286	0.000138487	8.55e-05
GOBP_POSITIVE_REGULATION_OF_GTPASE_ACTIVITY	1.84329	3.18e-06	1.96e-06
GOBP_COMPLEMENT_ACTIVATION_ALTERNATIVE_PATHWAY	1.84332	0.00150902	0.000931912
GOBP_REGULATION_OF_EPITHELIAL_CELL_MIGRATION	1.84423	3.01e-06	1.86e-06
GOBP_NEGATIVE_REGULATION_OF_COMPLEMENT_ACTIVATION	1.84476	0.000286275	0.000176793
GOBP_REGULATION_OF_OSTEOCLAST_DIFFERENTIATION	1.84513	0.00139219	0.000859763
GOBP_RENAL_SYSTEM_PROCESS	1.84529	0.0002329	0.000143831
GOBP_NEGATIVE_REGULATION_OF_HUMORAL_IMMUNE_RESPONSE	1.84577	0.000659512	0.00040729
GOBP_HEMOSTASIS	1.84634	4.69e-06	2.89e-06
GOBP_REACTIVE_OXYGEN_SPECIES_METABOLIC_PROCESS	1.84681	3.19e-06	1.97e-06
GOBP_POSITIVE_REGULATION_OF_PEPTIDYL_TYROSINE_PHOSPHORYLATION	1.84691	2.16e-05	1.33e-05
GOBP_POSITIVE_REGULATION_OF_LIPASE_ACTIVITY	1.84822	0.000440544	0.000272064
GOBP_NEGATIVE_REGULATION_OF_RESPONSE_TO_EXTERNAL_STIMULUS	1.84875	1.32e-08	8.16e-09
GOBP_REGULATION_OF_PLATELET_ACTIVATION	1.85026	0.00118561	0.000732188
GOBP_ADRENERGIC_RECEPTOR_SIGNALING_PATHWAY	1.85098	0.00163805	0.0010116
GOBP_LIPID_HOMEOSTASIS	1.85106	1.42e-05	8.78e-06
GOBP_FATTY_ACID_METABOLIC_PROCESS	1.85227	5.16e-08	3.19e-08
GOBP_ANATOMICAL_STRUCTURE_HOMEOSTASIS	1.85356	2.52e-07	1.56e-07
GOBP_GRANULOCYTE_CHEMOTAXIS	1.85512	9.01e-05	5.57e-05
GOBP_GRANULOCYTE_MIGRATION	1.85675	4.74e-05	2.93e-05
GOBP_T_CELL_DIFFERENTIATION_INVOLVED_IN_IMMUNE_RESPONSE	1.85998	0.000193188	0.000119306
GOBP_POSITIVE_REGULATION_OF_CHOLESTEROL_EFFLUX	1.86001	0.00158133	0.00097657
GOBP_NEGATIVE_REGULATION_OF_INTERLEUKIN_1_PRODUCTION	1.86021	0.000788201	0.000486764
GOBP_POSITIVE_REGULATION_OF_LEUKOCYTE_MIGRATION	1.86041	4.24e-05	2.62e-05
GOBP_INTERFERON_GAMMA_PRODUCTION	1.86112	0.000101727	6.28e-05
GOBP_TRIGLYCERIDE_METABOLIC_PROCESS	1.8615	0.000127891	7.9e-05
GOBP_RESPONSE_TO_CHEMOKINE	1.86229	0.000203274	0.000125535
GOBP_ICOSANOID_BIOSYNTHETIC_PROCESS	1.8633	0.000794729	0.000490795
GOBP_POSITIVE_REGULATION_OF_MONONUCLEAR_CELL_MIGRATION	1.86339	0.000428494	0.000264622
GOBP_INTERLEUKIN_8_PRODUCTION	1.86384	8.13e-05	5.02e-05
GOBP_REGULATION_OF_ENDOTHELIAL_CELL_MIGRATION	1.86441	3.03e-06	1.87e-06
GOBP_ANTIGEN_PROCESSING_AND_PRESENTATION_VIA_MHC_CLASS_IB	1.86512	0.000121731	7.52e-05
GOBP_REGULATION_OF_LIPID_KINASE_ACTIVITY	1.86517	0.000286275	0.000176793
GOBP_REGULATION_OF_ANTIGEN_PROCESSING_AND_PRESENTATION	1.86575	0.00168691	0.00104177
GOBP_BLOOD_VESSEL_ENDOTHELIAL_CELL_MIGRATION	1.86639	2.21e-05	1.37e-05
GOBP_REGULATION_OF_MACROPHAGE_ACTIVATION	1.86736	0.00116959	0.000722296
GOBP_CELLULAR_DEFENSE_RESPONSE	1.87621	0.000549326	0.000339243
GOBP_COMPLEMENT_ACTIVATION	1.8771	8.49e-05	5.24e-05
GOBP_DEFENSE_RESPONSE_TO_GRAM_NEGATIVE_BACTERIUM	1.87792	0.000153413	9.47e-05
GOBP_T_CELL_RECEPTOR_SIGNALING_PATHWAY	1.87803	9.04e-05	5.58e-05
GOBP_NEGATIVE_REGULATION_OF_REGULATED_SECRETORY_PATHWAY	1.87872	0.00186068	0.00114909
GOBP_NEGATIVE_REGULATION_OF_ADAPTIVE_IMMUNE_RESPONSE	1.87916	0.000364929	0.000225366
GOBP_PHOSPHOLIPID_METABOLIC_PROCESS	1.87953	2.25e-08	1.39e-08
GOBP_NEUTROPHIL_MEDIATED_IMMUNITY	1.88007	0.00346208	0.00213805
GOBP_ANTIBACTERIAL_HUMORAL_RESPONSE	1.88062	0.000530584	0.000327669
GOBP_CILIUM_OR_FLAGELLUM_DEPENDENT_CELL_MOTILITY	1.88118	2.49e-05	1.54e-05
GOBP_REGULATION_OF_B_CELL_RECEPTOR_SIGNALING_PATHWAY	1.88179	0.0017995	0.0011113
GOBP_POSITIVE_REGULATION_OF_INTERLEUKIN_6_PRODUCTION	1.88302	0.000123279	7.61e-05
GOBP_OSTEOCLAST_DIFFERENTIATION	1.88314	0.000123279	7.61e-05
GOBP_REGULATION_OF_BODY_FLUID_LEVELS	1.8834	1.3e-08	8.04e-09
GOBP_REGULATION_OF_LIPASE_ACTIVITY	1.88354	0.000203274	0.000125535
GOBP_ANTIGEN_RECEPTOR_MEDIATED_SIGNALING_PATHWAY	1.88363	1.3e-06	8.01e-07
GOBP_NEGATIVE_REGULATION_OF_INTERLEUKIN_1_BETA_PRODUCTION	1.88414	0.000510968	0.000315555
GOBP_CELLULAR_RESPONSE_TO_BIOTIC_STIMULUS	1.8861	4.73e-07	2.92e-07
GOBP_ERK1_AND_ERK2_CASCADE	1.88684	7.48e-08	4.62e-08
GOBP_POSITIVE_REGULATION_OF_CHEMOTAXIS	1.88746	1.99e-05	1.23e-05
GOBP_REGULATION_OF_CD4_POSITIVE_ALPHA_BETA_T_CELL_ACTIVATION	1.88807	0.000761833	0.00047048
GOBP_SECOND_MESSENGER_MEDIATED_SIGNALING	1.8882	7.35e-08	4.54e-08
GOBP_REGULATION_OF_ALPHA_BETA_T_CELL_DIFFERENTIATION	1.88918	0.000152216	9.4e-05
GOBP_POSITIVE_REGULATION_OF_INTERLEUKIN_12_PRODUCTION	1.88955	0.00118774	0.000733503
GOBP_REGULATION_OF_RESPONSE_TO_BIOTIC_STIMULUS	1.89	7.11e-08	4.39e-08
GOBP_INTERLEUKIN_2_PRODUCTION	1.89029	0.000681892	0.000421111
GOBP_POSITIVE_REGULATION_OF_ALPHA_BETA_T_CELL_DIFFERENTIATION	1.89061	0.00118774	0.000733503
GOBP_REGULATION_OF_MACROPHAGE_MIGRATION	1.89111	0.000639147	0.000394713
GOBP_NEGATIVE_REGULATION_OF_CELL_ADHESION	1.89342	1.16e-07	7.16e-08
GOBP_CD8_POSITIVE_ALPHA_BETA_T_CELL_ACTIVATION	1.89386	0.00121142	0.000748131
GOBP_NEGATIVE_REGULATION_OF_INFLAMMATORY_RESPONSE	1.89488	6.78e-06	4.19e-06
GOBP_NEGATIVE_REGULATION_OF_LYMPHOCYTE_MEDIATED_IMMUNITY	1.89556	0.000382803	0.000236405
GOBP_RESPONSE_TO_INTERLEUKIN_6	1.89664	0.000214414	0.000132414
GOBP_DEFENSE_RESPONSE_TO_GRAM_POSITIVE_BACTERIUM	1.90192	4.68e-05	2.89e-05
GOBP_NATURAL_KILLER_CELL_ACTIVATION	1.90332	5.3e-05	3.27e-05
GOBP_POSITIVE_REGULATION_OF_LYMPHOCYTE_MEDIATED_IMMUNITY	1.90591	3.12e-05	1.93e-05
GOBP_REACTIVE_NITROGEN_SPECIES_METABOLIC_PROCESS	1.90933	0.000106079	6.55e-05
GOBP_GLYCEROLIPID_METABOLIC_PROCESS	1.90947	5.1e-09	3.15e-09
GOBP_NEGATIVE_REGULATION_OF_PRODUCTION_OF_MOLECULAR_MEDIATOR_OF_IMMUNE_RESPONSE	1.91044	0.000524603	0.000323975
GOBP_CHOLESTEROL_EFFLUX	1.91122	0.000100945	6.23e-05
GOBP_REGULATION_OF_CALCIUM_MEDIATED_SIGNALING	1.9118	5.76e-05	3.56e-05
GOBP_POSITIVE_REGULATION_OF_LYMPHOCYTE_DIFFERENTIATION	1.91417	2.15e-05	1.32e-05
GOBP_MYELOID_LEUKOCYTE_DIFFERENTIATION	1.91457	1.27e-06	7.87e-07
GOBP_PEPTIDE_ANTIGEN_ASSEMBLY_WITH_MHC_PROTEIN_COMPLEX	1.91549	0.000103797	6.41e-05
GOBP_MACROPHAGE_CHEMOTAXIS	1.91581	0.00161709	0.000998652
GOBP_EXTRACELLULAR_TRANSPORT	1.91625	0.000626766	0.000387067
GOBP_CELLULAR_RESPONSE_TO_LIPOPROTEIN_PARTICLE_STIMULUS	1.91783	9.94e-05	6.14e-05
GOBP_RESPONSE_TO_TUMOR_CELL	1.91791	0.000422156	0.000260708
GOBP_PEPTIDE_ANTIGEN_ASSEMBLY_WITH_MHC_CLASS_II_PROTEIN_COMPLEX	1.91795	4.09e-06	2.53e-06
GOBP_POSITIVE_REGULATION_OF_NITRIC_OXIDE_METABOLIC_PROCESS	1.91814	0.000425266	0.000262628
GOBP_NEGATIVE_REGULATION_OF_TUMOR_NECROSIS_FACTOR_SUPERFAMILY_CYTOKINE_PRODUCTION	1.91875	3.68e-05	2.27e-05
GOBP_LYMPHOCYTE_COSTIMULATION	1.91994	0.000338485	0.000209035
GOBP_REGULATION_OF_MONONUCLEAR_CELL_MIGRATION	1.92186	9.88e-06	6.1e-06
GOBP_POSITIVE_REGULATION_OF_T_CELL_MEDIATED_CYTOTOXICITY	1.92203	0.000466708	0.000288221
GOBP_POSITIVE_REGULATION_OF_MAPK_CASCADE	1.9242	5.1e-09	3.15e-09
GOBP_RESPIRATORY_BURST	1.9246	0.000598977	0.000369906
GOBP_NEGATIVE_REGULATION_OF_IMMUNE_RESPONSE	1.92541	2.58e-06	1.6e-06
GOBP_CALCIUM_MEDIATED_SIGNALING	1.92803	1.16e-06	7.15e-07
GOBP_REGULATION_OF_ANTIGEN_RECEPTOR_MEDIATED_SIGNALING_PATHWAY	1.93085	0.000311971	0.000192662
GOBP_POSITIVE_REGULATION_OF_ADAPTIVE_IMMUNE_RESPONSE	1.93169	1.23e-05	7.6e-06
GOBP_REGULATION_OF_LYMPHOCYTE_DIFFERENTIATION	1.93206	7.77e-07	4.8e-07
GOBP_POSITIVE_REGULATION_OF_T_CELL_MEDIATED_IMMUNITY	1.93207	0.000244096	0.000150744
GOBP_STEROL_TRANSPORT	1.93348	1.77e-05	1.09e-05
GOBP_FC_RECEPTOR_SIGNALING_PATHWAY	1.93542	0.000142975	8.83e-05
GOBP_B_CELL_MEDIATED_IMMUNITY	1.93729	6.52e-07	4.03e-07
GOBP_FLUID_TRANSPORT	1.93762	0.000209333	0.000129276
GOBP_GRANULOCYTE_ACTIVATION	1.93943	6.71e-05	4.14e-05
GOBP_POSITIVE_T_CELL_SELECTION	1.93957	5.5e-05	3.39e-05
GOBP_LIPOPOLYSACCHARIDE_MEDIATED_SIGNALING_PATHWAY	1.93968	0.000172093	0.000106278
GOBP_CD4_POSITIVE_ALPHA_BETA_T_CELL_DIFFERENTIATION	1.94131	4.62e-05	2.86e-05
GOBP_NEGATIVE_REGULATION_OF_EXOCYTOSIS	1.94188	0.000335858	0.000207413
GOBP_LYMPHOCYTE_MIGRATION	1.94267	1.04e-05	6.42e-06
GOBP_REGULATION_OF_PATTERN_RECOGNITION_RECEPTOR_SIGNALING_PATHWAY	1.94408	1.64e-05	1.01e-05
GOBP_INTERLEUKIN_10_PRODUCTION	1.94488	0.000141957	8.77e-05
GOBP_DENDRITIC_CELL_CHEMOTAXIS	1.94577	0.000338822	0.000209244
GOBP_B_CELL_PROLIFERATION	1.95163	1.2e-05	7.41e-06
GOBP_ICOSANOID_METABOLIC_PROCESS	1.95195	8.89e-06	5.49e-06
GOBP_REGULATION_OF_CHOLESTEROL_EFFLUX	1.95237	0.000251324	0.000155208
GOBP_NEGATIVE_REGULATION_OF_LYMPHOCYTE_ACTIVATION	1.95259	1.91e-06	1.18e-06
GOBP_POSITIVE_REGULATION_OF_STEROL_TRANSPORT	1.95319	0.000233265	0.000144056
GOBP_ANTIGEN_PROCESSING_AND_PRESENTATION_OF_EXOGENOUS_PEPTIDE_ANTIGEN_VIA_MHC_CLASS_II	1.95482	0.00021364	0.000131936
GOBP_POSITIVE_REGULATION_OF_CHEMOKINE_PRODUCTION	1.95581	3.2e-05	1.98e-05
GOBP_REGULATION_OF_LEUKOCYTE_MIGRATION	1.95784	9.53e-08	5.89e-08
GOBP_NEGATIVE_REGULATION_OF_LEUKOCYTE_MEDIATED_IMMUNITY	1.95865	2.32e-05	1.43e-05
GOBP_INTERLEUKIN_12_PRODUCTION	1.95881	0.000121731	7.52e-05
GOBP_CELLULAR_RESPONSE_TO_MOLECULE_OF_BACTERIAL_ORIGIN	1.95883	9.52e-08	5.88e-08
GOBP_AMYLOID_BETA_CLEARANCE	1.96081	0.00020186	0.000124661
GOBP_REGULATION_OF_MAST_CELL_ACTIVATION_INVOLVED_IN_IMMUNE_RESPONSE	1.96131	0.000115385	7.13e-05
GOBP_POSITIVE_REGULATION_OF_DEFENSE_RESPONSE	1.96267	8.94e-09	5.52e-09
GOBP_ANTIGEN_PROCESSING_AND_PRESENTATION_OF_ENDOGENOUS_ANTIGEN	1.96331	0.000196401	0.00012129
GOBP_REGULATION_OF_CYTOSOLIC_CALCIUM_ION_CONCENTRATION	1.96361	5.1e-09	3.15e-09
GOBP_REGULATION_OF_PLASMA_LIPOPROTEIN_PARTICLE_LEVELS	1.96423	1.44e-05	8.91e-06
GOBP_T_CELL_SELECTION	1.96498	8.78e-05	5.42e-05
GOBP_REGULATION_OF_TOLL_LIKE_RECEPTOR_SIGNALING_PATHWAY	1.97056	6.66e-06	4.11e-06
GOBP_MAST_CELL_ACTIVATION_INVOLVED_IN_IMMUNE_RESPONSE	1.97129	0.000132199	8.16e-05
GOBP_REGULATION_OF_LEUKOCYTE_DEGRANULATION	1.97253	5.61e-05	3.46e-05
GOBP_CELL_CHEMOTAXIS	1.97845	5.1e-09	3.15e-09
GOBP_HUMORAL_IMMUNE_RESPONSE	1.97897	5.1e-09	3.15e-09
GOBP_CHEMOKINE_PRODUCTION	1.97905	1.25e-05	7.7e-06
GOBP_CYTOKINE_MEDIATED_SIGNALING_PATHWAY	1.98126	5.1e-09	3.15e-09
GOBP_CELLULAR_RESPONSE_TO_INTERFERON_GAMMA	1.98138	3.1e-06	1.92e-06
GOBP_POSITIVE_REGULATION_OF_LEUKOCYTE_MEDIATED_IMMUNITY	1.9817	1.31e-06	8.12e-07
GOBP_REGULATION_OF_PRODUCTION_OF_MOLECULAR_MEDIATOR_OF_IMMUNE_RESPONSE	1.98419	5.9e-07	3.65e-07
GOBP_POSITIVE_REGULATION_OF_CYTOKINE_PRODUCTION	1.98601	5.1e-09	3.15e-09
GOBP_MYELOID_LEUKOCYTE_MIGRATION	1.98702	2.39e-08	1.47e-08
GOBP_REGULATION_OF_T_CELL_DIFFERENTIATION	1.98747	7.89e-07	4.87e-07
GOBP_REGULATION_OF_STEROL_TRANSPORT	1.98872	8.94e-06	5.52e-06
GOBP_LYMPHOCYTE_ACTIVATION_INVOLVED_IN_IMMUNE_RESPONSE	1.99015	2.29e-07	1.41e-07
GOBP_REGULATION_OF_PHOSPHATIDYLINOSITOL_3_KINASE_ACTIVITY	1.99167	8e-05	4.94e-05
GOBP_POSITIVE_REGULATION_OF_TUMOR_NECROSIS_FACTOR_SUPERFAMILY_CYTOKINE_PRODUCTION	1.9919	1.47e-06	9.08e-07
GOBP_NEGATIVE_REGULATION_OF_CELL_CELL_ADHESION	1.99323	1.01e-07	6.22e-08
GOBP_MAST_CELL_ACTIVATION	1.99355	6.24e-06	3.85e-06
GOBP_PATTERN_RECOGNITION_RECEPTOR_SIGNALING_PATHWAY	1.99596	4.65e-07	2.87e-07
GOBP_ANTIGEN_PROCESSING_AND_PRESENTATION_OF_PEPTIDE_OR_POLYSACCHARIDE_ANTIGEN_VIA_MHC_CLASS_II	1.99608	5.82e-05	3.59e-05
GOBP_ALPHA_BETA_T_CELL_DIFFERENTIATION	1.99664	2.71e-06	1.67e-06
GOBP_CD4_POSITIVE_ALPHA_BETA_T_CELL_ACTIVATION	1.99702	2.61e-06	1.61e-06
GOBP_DENDRITIC_CELL_MIGRATION	1.9992	3.57e-05	2.2e-05
GOBP_STEROL_HOMEOSTASIS	2.00158	2.89e-06	1.79e-06
GOBP_REGULATION_OF_HEMOPOIESIS	2.00388	5.1e-09	3.15e-09
GOBP_POSITIVE_REGULATION_OF_ERK1_AND_ERK2_CASCADE	2.00421	2.79e-08	1.72e-08
GOBP_RESPONSE_TO_INTERFERON_GAMMA	2.00633	3.94e-07	2.43e-07
GOBP_REGULATION_OF_NITRIC_OXIDE_METABOLIC_PROCESS	2.00759	2.79e-05	1.72e-05
GOBP_MACROPHAGE_MIGRATION	2.00772	2.39e-05	1.48e-05
GOBP_POSITIVE_REGULATION_OF_ALPHA_BETA_T_CELL_ACTIVATION	2.00838	2.73e-06	1.69e-06
GOBP_NEGATIVE_REGULATION_OF_LEUKOCYTE_CELL_CELL_ADHESION	2.00891	5.2e-07	3.21e-07
GOBP_POSITIVE_REGULATION_OF_INTERLEUKIN_1_PRODUCTION	2.01238	2.09e-06	1.29e-06
GOBP_AXONEME_ASSEMBLY	2.01281	9.98e-06	6.16e-06
GOBP_CILIUM_MOVEMENT	2.01755	1.17e-07	7.24e-08
GOBP_IMMUNE_RESPONSE_REGULATING_CELL_SURFACE_RECEPTOR_SIGNALING_PATHWAY	2.0183	5.1e-09	3.15e-09
GOBP_PHOSPHATIDYLCHOLINE_METABOLIC_PROCESS	2.0195	4.76e-06	2.94e-06
GOBP_POSITIVE_REGULATION_OF_T_CELL_PROLIFERATION	2.02184	1.04e-06	6.42e-07
GOBP_T_CELL_ACTIVATION_INVOLVED_IN_IMMUNE_RESPONSE	2.02319	4.71e-07	2.91e-07
GOBP_ANTIGEN_PROCESSING_AND_PRESENTATION_OF_EXOGENOUS_PEPTIDE_ANTIGEN	2.02364	3.08e-06	1.9e-06
GOBP_REGULATION_OF_MYELOID_LEUKOCYTE_MEDIATED_IMMUNITY	2.02468	6.24e-06	3.85e-06
GOBP_LEUKOCYTE_CHEMOTAXIS	2.02702	5.1e-09	3.15e-09
GOBP_LEUKOCYTE_MIGRATION	2.02889	5.1e-09	3.15e-09
GOBP_RESPONSE_TO_MOLECULE_OF_BACTERIAL_ORIGIN	2.02895	5.1e-09	3.15e-09
GOBP_POSITIVE_REGULATION_OF_RESPONSE_TO_EXTERNAL_STIMULUS	2.02949	5.1e-09	3.15e-09
GOBP_MICROGLIAL_CELL_ACTIVATION	2.02975	8.89e-06	5.49e-06
GOBP_POSITIVE_REGULATION_OF_HEMOPOIESIS	2.0327	1.2e-07	7.4e-08
GOBP_LEUKOCYTE_DEGRANULATION	2.03281	1.71e-06	1.05e-06
GOBP_APOPTOTIC_CELL_CLEARANCE	2.03635	6.11e-06	3.77e-06
GOBP_POSITIVE_REGULATION_OF_INFLAMMATORY_RESPONSE	2.04086	2.29e-07	1.41e-07
GOBP_REGULATION_OF_INFLAMMATORY_RESPONSE	2.04519	5.1e-09	3.15e-09
GOBP_NEGATIVE_REGULATION_OF_CYTOKINE_PRODUCTION	2.04575	5.1e-09	3.15e-09
GOBP_PHAGOCYTOSIS	2.0468	5.1e-09	3.15e-09
GOBP_REGULATION_OF_ALPHA_BETA_T_CELL_ACTIVATION	2.04793	2.44e-07	1.51e-07
GOBP_POSITIVE_REGULATION_OF_INTERLEUKIN_1_BETA_PRODUCTION	2.05034	2.15e-06	1.33e-06
GOBP_REGULATION_OF_LEUKOCYTE_DIFFERENTIATION	2.05122	5.1e-09	3.15e-09
GOBP_REGULATION_OF_MAST_CELL_ACTIVATION	2.05194	5.55e-06	3.43e-06
GOBP_REGULATION_OF_PHAGOCYTOSIS	2.05204	3.68e-07	2.28e-07
GOBP_DENDRITIC_CELL_DIFFERENTIATION	2.05313	4.24e-06	2.62e-06
GOBP_T_CELL_DIFFERENTIATION	2.0542	5.1e-09	3.15e-09
GOBP_MYELOID_LEUKOCYTE_MEDIATED_IMMUNITY	2.05476	1.12e-07	6.92e-08
GOBP_REGULATION_OF_HUMORAL_IMMUNE_RESPONSE	2.05714	3.03e-06	1.87e-06
GOBP_REGULATION_OF_T_CELL_MEDIATED_CYTOTOXICITY	2.05749	4.38e-06	2.71e-06
GOBP_POSITIVE_REGULATION_OF_LEUKOCYTE_PROLIFERATION	2.06108	4.26e-08	2.63e-08
GOBP_MONONUCLEAR_CELL_DIFFERENTIATION	2.06129	5.1e-09	3.15e-09
GOBP_REGULATION_OF_T_CELL_MEDIATED_IMMUNITY	2.06212	2.7e-07	1.67e-07
GOBP_IMMUNE_RESPONSE_REGULATING_SIGNALING_PATHWAY	2.06906	5.1e-09	3.15e-09
GOBP_NEGATIVE_REGULATION_OF_CELL_ACTIVATION	2.07186	5.1e-09	3.15e-09
GOBP_POSITIVE_REGULATION_OF_CELL_ADHESION	2.07261	5.1e-09	3.15e-09
GOBP_POSITIVE_REGULATION_OF_CELL_ACTIVATION	2.07385	5.1e-09	3.15e-09
GOBP_RESPIRATORY_GASEOUS_EXCHANGE_BY_RESPIRATORY_SYSTEM	2.08027	4.04e-07	2.5e-07
GOBP_INTERLEUKIN_1_PRODUCTION	2.08212	4.43e-08	2.73e-08
GOBP_MONONUCLEAR_CELL_MIGRATION	2.08573	5.1e-09	3.15e-09
GOBP_POSITIVE_REGULATION_OF_CELL_KILLING	2.08768	2.06e-06	1.27e-06
GOBP_TOLL_LIKE_RECEPTOR_SIGNALING_PATHWAY	2.0932	6.12e-08	3.78e-08
GOBP_REGULATION_OF_LYMPHOCYTE_MEDIATED_IMMUNITY	2.09519	5.1e-09	3.15e-09
GOBP_ACTIVATION_OF_IMMUNE_RESPONSE	2.09574	5.1e-09	3.15e-09
GOBP_T_CELL_MEDIATED_CYTOTOXICITY	2.09825	7.89e-07	4.87e-07
GOBP_LYMPHOCYTE_MEDIATED_IMMUNITY	2.10145	5.1e-09	3.15e-09
GOBP_ANTIGEN_PROCESSING_AND_PRESENTATION_OF_EXOGENOUS_ANTIGEN	2.10171	4.63e-07	2.86e-07
GOBP_NEGATIVE_REGULATION_OF_IMMUNE_EFFECTOR_PROCESS	2.1021	1.14e-08	7.05e-09
GOBP_MACROPHAGE_ACTIVATION	2.10371	4.52e-08	2.79e-08
GOBP_NEGATIVE_REGULATION_OF_INTERLEUKIN_6_PRODUCTION	2.10722	3.43e-08	2.12e-08
GOBP_INTERLEUKIN_6_PRODUCTION	2.10926	5.1e-09	3.15e-09
GOBP_REGULATION_OF_CELL_KILLING	2.11393	3.46e-08	2.14e-08
GOBP_POSITIVE_REGULATION_OF_PHAGOCYTOSIS	2.11417	4.26e-08	2.63e-08
GOBP_REGULATION_OF_LEUKOCYTE_MEDIATED_CYTOTOXICITY	2.11516	1.6e-07	9.9e-08
GOBP_LEUKOCYTE_MEDIATED_CYTOTOXICITY	2.12484	7.02e-09	4.34e-09
GOBP_CELL_KILLING	2.12537	5.1e-09	3.15e-09
GOBP_REGULATION_OF_T_CELL_PROLIFERATION	2.12714	5.1e-09	3.15e-09
GOBP_NEGATIVE_REGULATION_OF_IMMUNE_SYSTEM_PROCESS	2.12741	5.1e-09	3.15e-09
GOBP_REGULATION_OF_CELL_CELL_ADHESION	2.12809	5.1e-09	3.15e-09
GOBP_ANTIGEN_PROCESSING_AND_PRESENTATION_OF_PEPTIDE_ANTIGEN	2.13407	3.46e-08	2.14e-08
GOBP_REGULATION_OF_LEUKOCYTE_PROLIFERATION	2.13427	5.1e-09	3.15e-09
GOBP_T_CELL_MEDIATED_IMMUNITY	2.13725	1.9e-08	1.17e-08
GOBP_POSITIVE_REGULATION_OF_IMMUNE_EFFECTOR_PROCESS	2.14718	5.1e-09	3.15e-09
GOBP_T_CELL_PROLIFERATION	2.14759	5.1e-09	3.15e-09
GOBP_CELL_ACTIVATION_INVOLVED_IN_IMMUNE_RESPONSE	2.15068	5.1e-09	3.15e-09
GOBP_ALPHA_BETA_T_CELL_ACTIVATION	2.15075	5.1e-09	3.15e-09
GOBP_MYELOID_CELL_ACTIVATION_INVOLVED_IN_IMMUNE_RESPONSE	2.1608	5.1e-09	3.15e-09
GOBP_REGULATION_OF_ADAPTIVE_IMMUNE_RESPONSE	2.16211	5.1e-09	3.15e-09
GOBP_POSITIVE_REGULATION_OF_CELL_CELL_ADHESION	2.16433	5.1e-09	3.15e-09
GOBP_LEUKOCYTE_MEDIATED_IMMUNITY	2.16438	5.1e-09	3.15e-09
GOBP_REGULATION_OF_T_CELL_ACTIVATION	2.17102	5.1e-09	3.15e-09
GOBP_ANTIGEN_PROCESSING_AND_PRESENTATION	2.17257	5.1e-09	3.15e-09
GOBP_LEUKOCYTE_PROLIFERATION	2.17353	5.1e-09	3.15e-09
GOBP_ADAPTIVE_IMMUNE_RESPONSE_BASED_ON_SOMATIC_RECOMBINATION_OF_IMMUNE_RECEPTORS_BUILT_FROM_IMMUNOGLOBULIN_SUPERFAMILY_DOMAINS	2.17602	5.1e-09	3.15e-09
GOBP_TUMOR_NECROSIS_FACTOR_SUPERFAMILY_CYTOKINE_PRODUCTION	2.17999	5.1e-09	3.15e-09
GOBP_LEUKOCYTE_CELL_CELL_ADHESION	2.18043	5.1e-09	3.15e-09
GOBP_T_CELL_ACTIVATION	2.18374	5.1e-09	3.15e-09
GOBP_POSITIVE_REGULATION_OF_LEUKOCYTE_CELL_CELL_ADHESION	2.19604	5.1e-09	3.15e-09
GOBP_REGULATION_OF_LEUKOCYTE_MEDIATED_IMMUNITY	2.19972	5.1e-09	3.15e-09
GOBP_MYELOID_LEUKOCYTE_ACTIVATION	2.24636	5.1e-09	3.15e-09
GOBP_REGULATION_OF_IMMUNE_EFFECTOR_PROCESS	2.26189	5.1e-09	3.15e-09
