# Supplementary material for: Abnormal low expression of SFTPC promotes the proliferation of lung adenocarcinoma by enhancing PI3K/AKT/mTOR signaling transduction
Source: Aging (Albany NY). 2023 Nov 12;15(21):12451–75. doi: 10.18632/aging.205191 (PMC10683597; doi:10.18632/aging.205191)
Supplement: Supplementary Table 4 [file aging-15-205191-s004.xlsx]

## Sheet: Sheet1
Supplementary Table 4. Correlation analyses between the SFTPC-related risk score and the sensitivity of 165 drugs.
Drug	R	P-Value
RO−3306	-0.65	<2.2e-16
Cisplatin	-0.64	<2.2e-16
Pyrimethamine	-0.63	<2.2e-16
Epothilone B	-0.59	<2.2e-16
BI−2536	-0.58	<2.2e-16
PHA−793887	-0.56	<2.2e-16
GW843682X	-0.555	<2.2e-16
FTI−277	-0.54	<2.2e-16
Ispinesib Mesylate	-0.54	<2.2e-16
Talazoparib	-0.54	<2.2e-16
CCT007093	-0.53	<2.2e-16
OSU−03012	-0.53	<2.2e-16
YK 4−279	-0.53	<2.2e-16
SL 0101−1	-0.52	<2.2e-16
Vinorelbine	-0.52	<2.2e-16
VX−680	-0.52	<2.2e-16
AG−014699	-0.51	<2.2e-16
AG−014699	-0.51	<2.2e-16
JNK−9L	-0.51	<2.2e-16
Masitinib	-0.51	<2.2e-16
Methotrexate	-0.5	<2.2e-16
NSC−207895	-0.5	<2.2e-16
AUY922	-0.49	<2.2e-16
A xitinib	-0.49	<2.2e-16
Paclitaxel	-0.49	<2.2e-16
XMD13−2	-0.49	<2.2e-16
Eto p o sid e	-0.48	<2.2e-16
GDC0449	-0.48	<2.2e-15
BMS−509744	-0.47	<2.2e-16
CX−5461	-0.47	<2.2e-16
EHT1864	-0.47	<2.2e-16
VX−11e	-0.47	<2.2e-16
A−770041	-0.46	<2.2e-16
GSK429286A	-0.46	<2.2e-16
GSK1904529A	-0.46	<2.2e-16
GW−2580	-0.46	<2.2e-16
NU−7441	-0.46	<2.2e-16
PD−0332991	-0.46	<2.2e-16
TG101348	-0.46	<2.2e-16
TW 37	-0.46	<2.2e-16
GSK−650394	-0.45	<2.2e-16
MG−132	-0.45	<2.2e-16
MLN4924	-0.45	<2.2e-16
PF−562271	-0.45	<2.2e-16
5−Fluorouracil	-0.44	<2.2e-16
Cytarabine	-0.44	<2.2e-16
Midostaurin	-0.44	<2.2e-16
NPK76−II−72−1	-0.44	<2.2e-16
XMD15−27	-0.44	<2.2e-16
A−443654	-0.43	< 2.2e-16
GSK1070916	-0.43	<2.2e-16
JW−7−24−1	-0.43	<2.2e-16
rTRAIL	-0.43	<2.2e-16
Bexarotene	-0.42	<2.2e-16
BMS−754807	-0.42	<2.2e-16
OSI−027	-0.42	<2.2e-16
PD−173074	-0.42	<2.2e-16
AT−7519	-0.41	<2.2e-16
MS−275	-0.41	<2.2e-16
QL−X−138	-0.41	<2.2e-16
Tivozanib	-0.41	<2.2e-16
CMK	-0.4	<2.2e-16
EKB−569	-0.4	<2.2e-16
Elesclomol	-0.4	<2.2e-16
Ruxolitinib	-0.4	<2.2e-16
ZM−447439	-0.4	<2.2e-16
Camptothecin	-0.39	<2.2e-16
CCT018159	-0.39	<2.2e-16
Cyclopamine	-0.39	<2.2e-16
GSK2126458	-0.39	<2.2e-16
JQ12	-0.39	<2.2e-16
Obatoclax Mesylate	-0.39	<2.2e-16
SB590885	-0.39	<2.2e-16
Tipifarnib	-0.39	<2.2e-16
Bortezomib	-0.38	<2.2e-16
Doxorubicin	-0.38	<2.2e-16
AICAR	-0.37	= 2.3e−16
Bleomycin (50 uM)	-0.37	<2.2e-16
Genentech Cpd 10	-0.37	<2.2e-16
TAE684	-0.37	<2.2e-16
Vinblastine	-0.37	= 2.3e−16
CGP−60474	-0.36	= 6.5e−16
Foretinib	-0.36	= 7.2e−16
Gemcitabine	-0.36	= 7.5e−16
SNX−2112	-0.36	= 9.9e−16
Sorafenib	-0.36	= 2.1e−15
S−Trityl−L−cysteine	-0.36	= 1.8e−15
WH−4−023	-0.36	= 2.2e−15
Zibotentan	-0.36	= 8.3e−16
KIN001−266	-0.35	= 5.4e−15
BX−912	-0.34	= 9.5e−14
CH5424802	-0.34	= 8.2e−14
Thapsigargin	-0.34	= 1.9e−14
CP724714	-0.33	= 1.3e−13
EX−527	-0.33	= 2.4e−13
JW−7−52−1	-0.33	= 3.6e−13
Pazopanib	-0.33	= 1.4e−13
PI−103	-0.33	= 2.7e−13
Shikonin	-0.33	= 1.2e−13
HG−6−64−1	-0.32	= 2.1e−12
QL−XI−92	-0.32	= 2.6e−12
Tubastatin A	-0.32	= 1.7e−12
BMS345541	-0.31	= 1.2e−11
AMG−706	-0.3	= 7.2e−11
Docetaxel	-0.3	= 3.6e−11
GSK690693	-0.3	= 1.8e−11
KIN001−055	-0.3	= 3.1e−11
QL−XII−47	-0.3	= 1.6e−11
QS11	-0.3	= 7.1e−11
SN−38	-0.3	= 4.8e−11
XMD11−85h	-0.3	= 6.8e−11
BEZ235	-0.29	= 1.3e−10
JNK Inhibitor VIII	-0.29	= 8e−11
PD−0325901	-0.29	= 8.6e−11
PF−4708671	-0.29	= 2.2e−10
WZ−1−84	-0.29	= 1.2e−10
XAV939	-0.29	= 2.5e−10
I−BET−762	-0.28	= 7.3e−10
XMD14−99	-0.28	= 1e−09
XL−184	-0.27	= 3.1e−09
AS601245	-0.26	1.5e-08
CP466722	-0.26	= 8.6e−09
GNF−2	-0.26	= 9.3e−09
Imatinib	-0.26	= 7.6e−09
PHA−665752	-0.26	= 1.2e−08
QL−XII−61	-0.26	= 1.6e−08
TL−1−85	-0.26	= 6.8e−09
Vorinostat	-0.26	= 1.5e−08
VX−702	-0.26	= 1.7e−08
Y−39983	-0.26	= 6.6e−09
Gefitinib	-0.25	= 5.4e−08
AKT inhibitor	-0.24	= 1.1e−07
Temsirolimus	-0.24	= 1.5e−07
AZD7762	-0.23	= 4.2e−07
Bryostatin 1	-0.23	= 7.1e−07
CI−1040	-0.23	= 3.6e−07
Embelin	-0.23	= 7.4e−07
FR−180204	-0.23	= 5.9e−07
PIK−93	-0.23	= 4.8e−07
WZ3105	-0.23	= 6.3e−07
BHG712	-0.22	= 1.1e−06
CAY10603	-0.22	= 1.9e−06
CEP−701	-0.22	= 2.1e−06
Parthenolide	-0.22	= 1e−06
STF−62247	-0.22	= 2.7e−06
AP−24534	-0.21	= 5.1e−06
Saracatinib	-0.21	= 3.8e−06
Sunitinib	-0.21	= 4.8e−06
UNC1215	-0.21	= 5.3e−06
GW441756	-0.2	=1.3e−05
XMD8−85	-0.2	= 1.2e−05
CGP−082996	-0.19	= 4.5e−05
Crizotinib	-0.19	= 3.7e−05
KIN001−260	-0.19	= 3.1e−05
TGX221	-0.19	= 6.1e−05
ATRA	-0.18	0.00012
Belinostat	-0.17	0.00025
MK−2206	-0.15	0.00084
681640	0.16	0.00039
BIRB0796	0.22	= 1.8e−06
Erlotinib	0.26	= 2.3e−08
Roscovitine	0.27	= 3.9e−09
Rapamycin	0.28	= 1.4e−09
Phenformin	0.34	= 3.3e−14
KIN001−135	0.35	= 6.5e−15
